RESEARCH ARTICLE

# Comparative analysis of complete plastid genomes from wild soybean (*Glycine soja*) and nine other *Glycine* species

Sajjad Asaf<sup>1</sup>, Abdul Latif Khan<sup>2</sup>, Muhammad Aaqil Khan<sup>1</sup>, Qari Muhammad Imran<sup>1</sup>, Sang-Mo Kang<sup>1</sup>, Khdiya Al-Hosni<sup>1</sup>, Eun Ju Jeong<sup>1</sup>, Ko Eun Lee<sup>1</sup>, In-Jung Lee<sup>1\*</sup>

**1** School of Applied Biosciences, Kyungpook National University, Daegu, Republic of Korea, **2** Chair of Oman's Medicinal Plants & Marine Natural Products, University of Nizwa, Nizwa, Oman

\* [ijlee@knu.ac.kr](mailto:ijlee@knu.ac.kr)

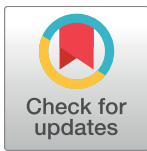

**OPEN ACCESS**

**Citation:** Asaf S, Khan AL, Aaqil Khan M, Muhammad Imran Q, Kang S-M, Al-Hosni K, et al. (2017) Comparative analysis of complete plastid genomes from wild soybean (*Glycine soja*) and nine other *Glycine* species. PLoS ONE 12(8): e0182281. <https://doi.org/10.1371/journal.pone.0182281>

**Editor:** Shilin Chen, Chinese Academy of Medical Sciences and Peking Union Medical College, CHINA

**Received:** March 27, 2017

**Accepted:** July 14, 2017

**Published:** August 1, 2017

**Copyright:** © 2017 Asaf et al. This is an open access article distributed under the terms of the [Creative Commons Attribution License](https://creativecommons.org/licenses/by/4.0/), which permits unrestricted use, distribution, and reproduction in any medium, provided the original author and source are credited.

**Data Availability Statement:** GenBank accession number: KY241814.

**Funding:** This work was supported by Korea Institute of Planning and Evaluation for Technology in Food, Agriculture, Forestry and Fisheries (IPET) through Agriculture, Food and Rural Affairs Research Center Support Program, funded by Ministry of Agriculture, Food and Rural Affairs (MAFRA)(716001-7).

## Abstract

The plastid genomes of different plant species exhibit significant variation, thereby providing valuable markers for exploring evolutionary relationships and population genetics. *Glycine soja* (wild soybean) is recognized as the wild ancestor of cultivated soybean (*G. max*), representing a valuable genetic resource for soybean breeding programmes. In the present study, the complete plastid genome of *G. soja* was sequenced using Illumina paired-end sequencing and then compared it for the first time with previously reported plastid genome sequences from nine other *Glycine* species. The *G. soja* plastid genome was 152,224 bp in length and possessed a typical quadripartite structure, consisting of a pair of inverted repeats (IRa/IRb; 25,574 bp) separated by small (178,963 bp) and large (83,181 bp) single-copy regions, with a 51-kb inversion in the large single-copy region. The genome encoded 134 genes, including 87 protein-coding genes, eight ribosomal RNA genes, and 39 transfer RNA genes, and possessed 204 randomly distributed microsatellites, including 15 forward, 25 tandem, and 34 palindromic repeats. Whole-plastid genome comparisons revealed an overall high degree of sequence similarity between *G. max* and *G. gracilis* and some divergence in the intergenic spacers of other species. Greater numbers of indels and SNP substitutions were observed compared with *G. cyrtoloba*. The sequence of the *accD* gene from *G. soja* was highly divergent from those of the other species except for *G. max* and *G. gracilis*. Phylogenomic analyses of the complete plastid genomes and 76 shared genes yielded an identical topology and indicated that *G. soja* is closely related to *G. max* and *G. gracilis*. The complete *G. soja* genome sequenced in the present study is a valuable resource for investigating the population and evolutionary genetics of *Glycine* species and can be used to identify related species.

## Introduction

The chloroplast (cp) is a key organelle in photosynthesis and in the biosynthesis of fatty acids, starches, amino acids, and pigments [1, 2]. In angiosperms, plastomes are typically

**Competing interests:** The authors have no competing interest.

circular and highly conserved, ranging from 115 to 165 kb in length and comprising a small single-copy region (SSC; 16–27 kb) and a large-single-copy region (LSC; 80–90 kb), separated by a pair of inverted repeats (IRs) [3, 4]. Most plastomes also contain 110–130 genes encoding up to 80 unique proteins and approximately 4 rRNAs and 30 tRNAs. Most of the protein-coding genes are associated with photosynthesis or other biochemical processes in plant cells, such as synthesis of amino acids, sugars, vitamins, lipids, pigments, and starches, storage, nitrogen metabolism, sulphate reduction, and immune responses [5, 6]. In contrast to mitochondrial and nuclear genomes, the plastomes of plants are highly conserved in regard to gene structure, organization, and content [4]. However, gene duplications, mutations, rearrangements, and losses have been observed in some angiosperm lineages [7]. Rearrangements of plastid gene order are generally observed in taxa with plastomes that exhibit at least one of the following qualities: variable IR region size, loss of one IR region, a high frequency of small dispersed repeats, complete or near-complete lack of photosynthesis, or biparental cp inheritance [8]. In addition, plastome inversions have been reported in a number of angiosperm families, including Asteraceae [9], Campanulaceae [10], Onagraceae [11], Leguminosae [12], and Geraniaceae [13, 14]. The plastomes of several members of the Papilionoideae also exhibit significant variation and rearrangement, including the loss of an IR region [15] and inversion of a 50-kb portion of the LSC [16, 17]. These features, as well as the loss of introns from the *rps12* and *clpP* genes [18, 19] and transfer of *rpl22* to the nucleus [20, 21], have been well documented, and their occurrence has been mapped onto the phylogeny of Leguminosae [19].

The genus *Glycine* comprises at least 28 species, which are separated into two subgenera, *Glycine* and *Soja*. The annuals include cultivated soybean, *G. max*, and the wild soybean, *G. soja*, that are native to eastern Asia, whereas most of the other species are perennials that are native to Australia. Researchers previously classified *Glycine* species into various groups (A-I) on the basis of fertility of artificially produced hybrids and the degree to which meiotic chromosomes pair [22], and Ratnaparkhe et al. (2011) [23] further reviewed the nine genome groups using isozymes and sequences of two nuclear loci (H3D and nrDNA ITS).

Plastid data from various *Glycine* species (annual and perennial) have been used in studies of phylogenetic and genetic diversity [24–28], including the investigation of neopolyploidy [29, 30]. For example, Doyle et al. (1990b) [24] identified three major clades within the perennial subgenus, showing varying degrees of agreement with nuclear phylogenies. However, additional research revealed incongruence between the plastid and nuclear phylogenies of the various genome groups [31]. The most noticeable incongruity was the placement of *G. falcata*, which is the sole species in the F-genome group. According to the H3D gene-based phylogeny, *G. falcata* is sister to all other perennial species, whereas chloroplast DNA fragment-based phylogenies strongly supported the placement of *G. falcata* in the A-genome clade [16, 30, 32].

The advent of high-throughput sequencing technology has facilitated rapid progress in the field of genomics, especially in cp genetics. Since the first plastome was sequenced in 1986 [33], over 800 complete plastid genome sequences have been made available through the National Center for Biotechnology Information (NCBI) organelle genome database, including 300 from crop and tree genomes [34]. To date, complete plastomes have been reported for nine *Glycine* species [35–37]. In the present study, the complete plastome of *G. soja* was sequenced (GenBank accession number: KY241814) with the aim of elucidating global patterns of structural variation in the *G. soja* plastome and comparing it for the first time with the available plastomes of nine other *Glycine* species (*G. max*, *G. gracilis*, *G. canescens*, *G. cyrtoloba*, *G. dolichocarpa*, *G. falcata*, *G. stenophita*, *G. syndetika*, and *G. tomentella*).

## Materials and methods

### Chloroplast genome sequencing and assembly

The *G. soja* (accession KLG90379), seeds were received from the National Gene Bank of the Rural Development Administration of the Republic of Korea. Plants were cultivated in greenhouse at the Kyungpook National University, Republic of Korea. Plastid DNA was extracted from young leaves using the protocol described by Hu et al. [38], and the resulting DNA was sequenced using the Illumina HiSeq-2000 platform (San Diego, CA, USA) at Macrogen (Seoul, Korea). The *G. soja* plastome was then assembled *de novo* using a bioinformatics pipeline (<http://phyzen.com>). More specifically, a 400-bp paired-end library was produced according to the Illumina PE standard protocol, which resulted in 28,110,596 bp of sequence data, with a 101-bp average read length. Raw reads with Phred scores of 20 or lower were removed from the total PE reads using the CLC-quality trim tool, and *de novo* assembly of the trimmed reads was accomplished using CLC Genomics Workbench v7.0 (CLC Bio, Aarhus, Denmark) with a minimum overlap of 200 to 600 bp. The resulting contigs were compared against the *G. max* plastome using BLASTN with an E-value cutoff of  $1e-5$ , and five contigs were identified and temporarily arranged based on their mapping position in the reference genome. After initial assembly, primers were designed (S1 Table) based on the terminal sequences of adjacent contigs, and PCR amplification and subsequent DNA sequencing were employed to fill in the gaps. PCR amplification was performed in 20- $\mu$ l reactions that contained 1 $\times$  reaction buffer, 0.4  $\mu$ l dNTPs (10 mM), 0.1  $\mu$ l Taq (Solg h-TaQ DNA Polymerase), 1  $\mu$ l (10 pm/ $\mu$ l) primers, and 1  $\mu$ l (10 ng/ $\mu$ l) DNA, under the following conditions: initial denaturation at 95°C for 5 min; 35 cycles of 95°C for 30 s, 60°C for 20 s, and 72°C for 30 s; and a final extension step of 72°C for 5 min. After incorporating the additional sequencing results, the complete plastome was used as a reference to map the remaining unmapped short reads to improve the sequence coverage of the assembled genome.

### Analysis of gene content and sequence architecture

The *G. soja* plastome was annotated using DOGMA [39] and checked manually, and codon positions were adjusted based on comparison with homologs in the plastome of *G. max*. The transfer RNA sequences of the *G. soja* plastome were verified using tRNAscan-SE version 1.21 [40], with the default settings, and structural features were illustrated using OGDRAW [41]. To examine deviations in synonymous codon usage by avoiding the influence of the amino acid composition, the relative synonymous codon usage (RSCU) was determined using MEGA 6 [42]. Finally, the divergence of the new *G. soja* plastome from both perennial and annual *Glycine* species was assessed with mVISTA [43] in Shuffle-LAGAN mode, employing the new *G. soja* genome as a reference.

### Characterization of repeat sequences and simple sequence repeats (SSRs)

Repeat sequences, including direct, reverse, and palindromic repeats, were identified within the plastome using REPuter [44], with the following settings: Hamming distance of 3,  $\geq 90\%$  sequence identity, and minimum repeat size of 30 bp. Additionally, SSRs were detected using Phobos version 3.3.12 [45], with the search parameters set to  $\geq 10$  repeat units for mononucleotide repeats,  $\geq 8$  repeat units for dinucleotide repeats,  $\geq 4$  repeat units for trinucleotide and tetranucleotide repeats, and  $\geq 3$  repeat units for pentanucleotide and hexanucleotide repeats. Tandem repeats were identified using Tandem Repeats Finder version 4.07 b [46], with default settings.

## Sequence divergence and phylogenetic analyses

The average pairwise sequence divergence of 76 shared genes and the complete plastomes of 11 *Glycine* species were analysed using data from *G. soja* new (KY241814), *G. soja* old (NC022868), *G. max*, *G. gracilis*, *G. canescens*, *G. cyrtoloba*, *G. dolichocarpa*, *G. falcata*, *G. stenophita*, *G. syndetika*, and *G. tomentella*. Missing and ambiguous gene annotations were confirmed through comparative sequence analysis, after assembling a multiple sequence alignment and comparing gene order. The complete genome dataset was aligned using MAFFT version 7.222 [47], with default parameters, and Kimura's two-parameter (K2P) model was selected to calculate pairwise sequence divergence [48]. A sliding window analysis was conducted to determine the nucleotide diversity ( $\pi$ ) of the cp genome using DnaSP (DNA Sequences Polymorphism version 5.10.01) software [49]. The step size was set to 200 bp, with a window length of 800 bp. Similarly, Indel polymorphisms among the complete genomes were identified using DnaSP 5.10.01 [49], and a custom Python script (<https://www.biostars.org/p/119214/>) was employed to identify single-nucleotide polymorphisms. To resolve the phylogenetic position of *G. soja* within the genus *Glycine*, ten published *Glycine* species plastomes were downloaded from the NCBI database for phylogenetic analysis. Multiple alignment of the complete plastomes were constructed based on the conserved structure and gene order of the plastid genomes [8], and four methods were employed to construct phylogenetic trees: Bayesian inference (BI), implemented using MrBayes 3.1.2 [50]; maximum parsimony (MP), implemented using PAUP 4.0 [51]; and both maximum likelihood (ML) and joining-joining (NJ), implemented using MEGA 6 [42], employing previously described settings [52, 53]. In a second phylogenetic analysis, 76 shared cp genes from eleven *Glycine* species and two outgroup species (*Phaseolus vulgaris* and *Vigna radiata*) were aligned using ClustalX with default settings, followed by manual adjustment to preserve reading frames. Finally, the same four phylogenetic inference methods were employed to infer trees from the 76 concatenated genes, using the same settings [52, 53].

## Results and discussion

### Plastid genome organization

A total of 2,611,513 reads with an average read length of 101 bp were obtained, and these reads provided 1514.9 $\times$  coverage of the plastome. The consensus sequence for a specific position was generated by assembling reads that were mapped with at least 934 reads per position and was used to construct the complete sequence of the *G. soja* plastome. The assembled *G. soja* plastome was typical of angiosperms, with a pair of IR regions (25,574 bp), an LSC of 83,181 bp, and an SSC of 178,963 bp (Fig 1); a total size of 152,224 bp; and a GC content of 35.4% (Table 1). In addition, approximately 33.23% of the genome was non-coding, whereas protein-coding, rRNA, and tRNA genes constituted 52.06, 5.94, and 1.92% of the plastome, respectively (Table 2), similar to the values observed in other legume genomes. As observed in other angiosperm plastomes, the GC content was unequally distributed in the *G. soja* plastome; it was high in the IR regions (41.8%), moderate in the LSC region (32.8%), and low in the SSC region (28.73%; Table 1). The high GC content of the IR regions is due to the presence of eight ribosomal RNA (rRNA) sequences in these regions, as reported previously [54, 55].

The total coding DNA sequences (CDSs) were 79,250 bp in length and encoded 87 genes, including 26,416 codons (Table 3). The codon-usage frequency of the *G. soja* plastome was determined based on tRNA and protein-coding gene sequences (Table 4). Leucine (10.6%) and cysteine (1.2%) were the most and least frequently encoded amino acids, respectively, and

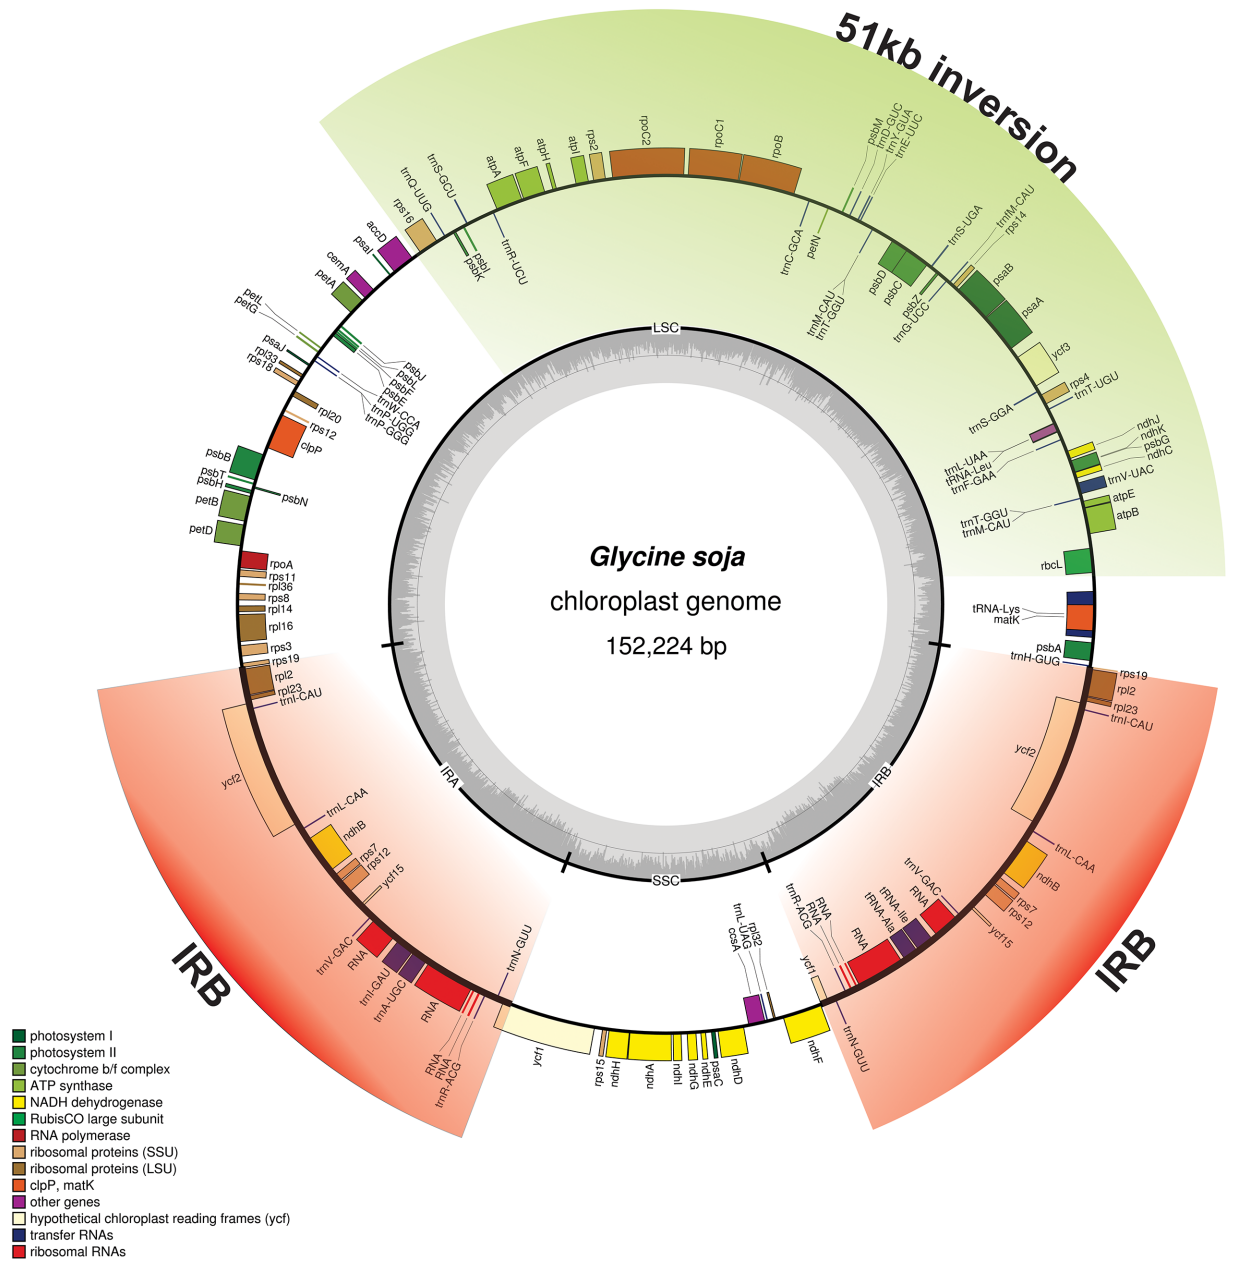

**Fig 1. Gene map of the *Glycine soja* plastid genome.** Thick lines in the red area indicate the extent of the inverted repeat regions (IRA and IRB; 25,574 bp), which separate the genome into small (SSC; 17,896 bp) and large (LSC; 83,181 bp) single-copy regions. Genes located inside the circle are transcribed clockwise, and those outside the circle are transcribed counterclockwise. Genes belonging to different functional groups are colour-coded. The dark grey in the inner circle corresponds to the GC content, and the light grey corresponds to the AT content. The green colour arc indicates the location of the 51-kb inversion.

<https://doi.org/10.1371/journal.pone.0182281.g001>

isoleucine, serine, glycine, arginine, and alanine constituted 9.0%, 7.7%, 6.5%, 5.8%, and 5.0% of the CDSs, respectively, as reported previously [54, 56].

Among these codons, the most and least frequently used were AAA (n = 1,181), which encodes lysine, and ATC and ATT (n = 1, n = 1), which both encode methionine. The AT contents of the 1<sup>st</sup>, 2<sup>nd</sup>, and 3<sup>rd</sup> codon positions of CDSs were 55.7%, 62.9%, and 72.4%, respectively (Table 3). The high AT content observed at the 3<sup>rd</sup> codon position is similar to that

**Table 1. Summary of complete chloroplast genomes for ten *Glycine* species.**

| Region       | <i>G.soja</i> <sup>a</sup> | <i>G.soja</i> | <i>G.max</i> | <i>G.graci</i> | <i>G.canes</i> | <i>G.cyrtoI</i> | <i>G.doli</i> | <i>G.falca</i> | <i>G.stenop</i> | <i>G.syndet</i> | <i>G.tome</i> |
|--------------|----------------------------|---------------|--------------|----------------|----------------|-----------------|---------------|----------------|-----------------|-----------------|---------------|
| <b>LSC</b>   |                            |               |              |                |                |                 |               |                |                 |                 |               |
| Length (bp)  | 83,181                     | 83,174        | 83,174       | 83,175         | 83,579         | 83,174          | 83,815        | 84,027         | 83,937          | 83,839          | 83,773        |
| GC(%)        | 32.8                       | 32.8          | 32.8         | 32.8           | 32.7           | 32.7            | 32.7          | 32.7           | 32.8            | 32.7            | 32.7          |
| Length (%)   | 54.64                      | 54.64         | 54.64        | 54.64          | 54.64          | 54.58           | 54.8          | 54.9           | 54.99           | 54.87           | 54.85         |
| <b>SSC</b>   |                            |               |              |                |                |                 |               |                |                 |                 |               |
| Length (bp)  | 17,896                     | 17,895        | 17,896       | 17,895         | 17,880         | 17,838          | 17,807        | 17,846         | 17,817          | 17,859          | 17,829        |
| GC(%)        | 28.7                       | 28.8          | 28.8         | 28.8           | 28.6           | 28.6            | 28.7          | 28.7           | 28.8            | 28.7            | 28.7          |
| Length (%)   | 11.75                      | 11.75         | 11.75        | 11.75          | 11.75          | 11.70           | 11.65         | 11.66          | 11.67           | 11.68           | 16.67         |
| <b>IR</b>    |                            |               |              |                |                |                 |               |                |                 |                 |               |
| Length (bp)  | 25,574                     | 25,574        | 25,574       | 25,574         | 25,530         | 25,485          | 25,591        | 25,575         | 25,432          | 25,542          | 25,563        |
| GC(%)        | 41.8                       | 41.9          | 41.9         | 41.9           | 41.9           | 41.9            | 41.9          | 41.9           | 41.8            | 41.9            | 41.9          |
| Length (%)   | 16.80                      | 16.8          | 16.8         | 16.8           | 16.77          | 16.72           | 16.74         | 16.71          | 16.66           | 16.71           | 16.73         |
| <b>Total</b> |                            |               |              |                |                |                 |               |                |                 |                 |               |
| GC(%)        | 35.4                       | 35.4          | 35.4         | 35.4           | 35.3           | 35.3            | 35.3          | 35.3           | 35.3            | 35.3            | 35.3          |
| Length (bp)  | 152,224                    | 152,217       | 152,218      | 152,218        | 152,218        | 152,381         | 152,804       | 153,023        | 152,618         | 152,783         | 152,728       |

*G.soja*<sup>a</sup> = *G. soja* new (in this study),

*G.soja* = *G. soja* (old), *G.max* = *G. max*, *G.graci* = *G.gracilis*, *G.canes* = *G.canescens*, *G.cyrtoI* = *G. cyrtoloba*, *G.doli* = *G.dolichocarpa*, *G.falca* = *G.falcata*, *G.stenop* = *G.stenophita*, *G.syndet* = *G.sydetika*, *G.tome* = *G.tomentella*

<https://doi.org/10.1371/journal.pone.0182281.t001>

reported for the plastomes of other terrestrial plants [54, 57, 58]. In addition, 46.36% and 57.65% of the preferred synonymous codons (RSCU > 1) ended with A or U and C or G, respectively, and 44.30% and 55.20% of the non-preferred synonymous codons (RSCU < 1) ended with C or G and A or U, respectively. However, there was no bias in start codon usage (AUG or UGG; RSCU = 1; Table 4).

**Table 2. Comparison of coding and non-codign region size among ten *Glycine* species.**

| Region                | <i>G.soja</i> <sup>a</sup> | <i>G.soja</i> | <i>G.max</i> | <i>G.graci</i> | <i>G.canes</i> | <i>G.cyrtoI</i> | <i>G.doli</i> | <i>G.falca</i> | <i>G.stenop</i> | <i>G.syndet</i> | <i>G.tome</i> |
|-----------------------|----------------------------|---------------|--------------|----------------|----------------|-----------------|---------------|----------------|-----------------|-----------------|---------------|
| <b>Protein Coding</b> |                            |               |              |                |                |                 |               |                |                 |                 |               |
| Length (bp)           | 79,250                     | 77,835        | 77,769       | 77,811         | 77,607         | 72,294          | 77,649        | 77,598         | 77,646          | 77,604          | 77,601        |
| GC(%)                 | 36.2                       | 36.1          | 36.1         | 36.1           | 36.1           | 36.8            | 36.1          | 36.1           | 36.1            | 36.1            | 36.1          |
| Length (%)            | 52.06                      | 51.13         | 51.12        | 51.11          | 50.98          | 47.44           | 50.91         | 50.71          | 50.8            | 50.7            | 50.8          |
| <b>tRNA</b>           |                            |               |              |                |                |                 |               |                |                 |                 |               |
| Length (bp)           | 2,925                      | 2,817         | 2,792        | 2,799          | 2,792          | 2,792           | 2,792         | 2,792          | 2,792           | 2,792           | 2,792         |
| GC(%)                 | 52.4                       | 52.9          | 52.9         | 53.0           | 52.8           | 52.8            | 52.8          | 52.9           | 52.8            | 52.8            | 52.8          |
| Length (%)            | 1.92                       | 1.85          | 1.83         | 1.83           | 1.83           | 1.83            | 1.82          | 1.82           | 1.82            | 1.82            | 1.82          |
| <b>rRNA</b>           |                            |               |              |                |                |                 |               |                |                 |                 |               |
| Length (bp)           | 9,054                      | 9,054         | 9,054        | 9,054          | 9,054          | 9,054           | 9,054         | 9,054          | 9,054           | 9,054           | 9,054         |
| GC(%)                 | 54.9                       | 54.9          | 54.9         | 54.9           | 54.9           | 54.9            | 54.9          | 54.9           | 54.9            | 54.9            | 54.9          |
| Length (%)            | 5.94                       | 5.94          | 5.94         | 5.94           | 5.94           | 5.94            | 5.93          | 5.91           | 5.93            | 5.93            | 5.94          |
| <b>Intergenic</b>     |                            |               |              |                |                |                 |               |                |                 |                 |               |
| GC(%)                 | 33.23                      | 33.45         | 33.26        | 33.23          | 33.45          | 33.23           | 33.432        | 33.23          | 33.454          | 33.45           | 33.26         |
| Length (bp)           | 60,995                     | 62,511        | 62,603       | 62,554         | 62,765         | 68,241          | 63,309        | 63,579         | 63,123          | 63,333          | 63,281        |

*G.soja*<sup>a</sup> = *G. soja* (in this study),

*G.soja* = *G. soja* (old), *G.max* = *G. max*, *G.graci* = *G.gracilis*, *G.canes* = *G.canescens*, *G.cyrtoI* = *G. cyrtoloba*, *G.doli* = *G.dolichocarpa*, *G.falca* = *G.falcata*, *G.stenop* = *G.stenophita*, *G.syndet* = *G.sydetika*, *G.tome* = *G.tomentella*

<https://doi.org/10.1371/journal.pone.0182281.t002>

**Table 3. Base composition of the *G. soja* plastid genome.**

|                             | T/U(%) | C (%) | A (%) | G(%) | Length (bp) |
|-----------------------------|--------|-------|-------|------|-------------|
| <b>Genome</b>               | 32.3   | 17.4  | 32.4  | 18.0 | 152,224     |
| <b>LSC</b>                  | 33.6   | 16.0  | 33.6  | 16.8 | 83,181      |
| <b>SSC</b>                  | 35.3   | 13.6  | 36.0  | 15.1 | 17,896      |
| <b>IR</b>                   | 29.0   | 21.7  | 29.2  | 20.1 | 25,574      |
| <b>tRNA</b>                 | 25.2   | 23.1  | 22.4  | 29.3 | 2,925       |
| <b>rRNA</b>                 | 18.9   | 23.4  | 26.2  | 31.5 | 9,054       |
| <b>Protein-coding genes</b> | 32.2   | 17.0  | 31.5  | 19.2 | 79,250      |
| <b>1st position</b>         | 24.1   | 18.3  | 31.6  | 25.8 | 26,416      |
| <b>2nd position</b>         | 33.2   | 19.8  | 29.7  | 17.1 | 26,416      |
| <b>3rd position</b>         | 39.2   | 12.7  | 33.2  | 14.7 | 26,416      |

<https://doi.org/10.1371/journal.pone.0182281.t003>

**Table 4. The codon-anticodon recognition pattern and codon usage for the *G. soja* plastid genome.**

| Amino acid | Codon | No   | RSCU | tRNA                 | Amino acid | Codon | No   | RSCU | tRNA                 |
|------------|-------|------|------|----------------------|------------|-------|------|------|----------------------|
| Phe        | UUU   | 1099 | 1.28 |                      | Ala        | GCA   | 395  | 1.18 | <i>trnA-UGC</i>      |
| Phe        | UUC   | 503  | 0.7  | <i>trnF-GAA</i>      | Ala        | GCG   | 122  | 0.5  |                      |
| Leu        | UUA   | 932  | 1.9  | <i>trnL-UAA tRNA</i> | Tyr        | UAU   | 846  | 1.5  |                      |
| Leu        | UUG   | 557  | 1.1  | <i>trnL-CAA tRNA</i> | Tyr        | UAC   | 165  | 0.47 | <i>trnY-GUA tRNA</i> |
| Leu        | CUU   | 589  | 1.29 |                      | Stop       | UAG   | 1    | 0.74 |                      |
| Leu        | CUC   | 172  | 0.4  |                      | Stop       | UGA   | 0    | 0.80 |                      |
| Leu        | CUA   | 381  | 0.87 | <i>trnL-UAG tRNA</i> | Stop       | UAA   | 5    | 1.44 |                      |
| Leu        | CUG   | 164  | 0.32 |                      | His        | CAU   | 503  | 1.49 |                      |
| Ile        | AUU   | 1170 | 1.51 |                      | His        | CAC   | 134  | 0.50 | <i>trnH-GUG tRNA</i> |
| Ile        | AUC   | 392  | 0.5  | <i>trnI-GAU tRNA</i> | Gln        | CAA   | 764  | 1.53 | <i>trnQ-UUG tRNA</i> |
| Ile        | AUA   | 827  | 0.89 |                      | Gln        | CAG   | 200  | 0.49 |                      |
| Met        | AUG   | 499  | 1    | <i>trnM-CAU tRNA</i> | Asn        | AAU   | 1045 | 1.44 |                      |
| Val        | GUU   | 533  | 1.50 |                      | Asn        | AAC   | 286  | 0.55 | <i>trnQ-UUG tRNA</i> |
| Val        | GUC   | 158  | 0.46 | <i>trnV-GAC tRNA</i> | Lys        | AAA   | 1181 | 1.44 | <i>trnK-UUU tRNA</i> |
| Val        | GUA   | 534  | 1.47 | <i>trnV-UAC tRNA</i> | Lys        | AAG   | 331  | 0.55 |                      |
| Val        | GUG   | 173  | 0.54 |                      | Asp        | GAU   | 827  | 1.55 |                      |
| Ser        | UCU   | 591  | 1.56 |                      | Asp        | GAC   | 204  | 0.44 | <i>trnD-GUC tRNA</i> |
| Ser        | UCC   | 298  | 1.23 | <i>trnS-GGA tRNA</i> | Glu        | GAA   | 1042 | 1.48 | <i>trnE-UUC tRNA</i> |
| Ser        | UCA   | 442  | 1.03 | <i>trnS-UGA tRNA</i> | Glu        | GAG   | 313  | 0.51 |                      |
| Ser        | UCG   | 181  | 0.48 |                      | Cys        | UGU   | 231  | 1.50 |                      |
| Ser        | AGU   | 405  | 1.24 |                      | Cys        | UGC   | 85   | 0.49 |                      |
| Ser        | AGC   | 120  | 0.42 | <i>trnS-GCU tRNA</i> | Trp        | UGG   | 442  | 1    | <i>trnW-CCA tRNA</i> |
| Pro        | CCU   | 403  | 1.59 |                      | Arg        | CGU   | 339  | 1.36 | <i>trnR-ACG tRNA</i> |
| Pro        | CCC   | 202  | 0.86 |                      | Arg        | CGC   | 91   | 0.51 |                      |
| Pro        | CCA   | 334  | 1.07 | <i>trnP-UGG tRNA</i> | Arg        | CGA   | 361  | 1.24 |                      |
| Pro        | CCG   | 122  | 0.47 |                      | Arg        | CGG   | 100  | 0.48 |                      |
| Thr        | ACU   | 571  | 1.68 |                      | Arg        | AGA   | 485  | 1.77 | <i>trnR-UCU tRNA</i> |
| Thr        | ACC   | 210  | 0.76 | <i>trnT-GGU tRNA</i> | Arg        | AGG   | 156  | 0.61 |                      |
| Thr        | ACA   | 421  | 1.08 | <i>trnT-UGU tRNA</i> | Gly        | GGU   | 585  | 1.28 |                      |
| Thr        | ACG   | 139  | 0.45 |                      | Gly        | GGC   | 157  | 0.42 |                      |
| Ala        | GCU   | 623  | 1.72 |                      | Gly        | GGA   | 691  | 1.52 | <i>trnG-UCC tRNA</i> |
| Ala        | GCC   | 189  | 0.59 |                      | Gly        | GGG   | 282  | 0.77 |                      |

<https://doi.org/10.1371/journal.pone.0182281.t004>

**Table 5. Genes in the sequenced *G. soja* chloroplast genome.**

| Category         | Group of genes                      | Name of genes                                                                                                                                                                                                                                                                                                      |
|------------------|-------------------------------------|--------------------------------------------------------------------------------------------------------------------------------------------------------------------------------------------------------------------------------------------------------------------------------------------------------------------|
| Self-replication | Large subunit of ribosomal proteins | <i>rpl2, 14, 16, 20, 22, 23, 32, 33, 36</i>                                                                                                                                                                                                                                                                        |
|                  | Small subunit of ribosomal proteins | <i>rps2, 3, 4, 7, 8, 11, 12, 14, 15, 16, 18, 19</i>                                                                                                                                                                                                                                                                |
|                  | DNA dependent RNA polymerase        | <i>rpoA, B, C1, C2</i>                                                                                                                                                                                                                                                                                             |
|                  | rRNA genes                          | <i>RNA</i>                                                                                                                                                                                                                                                                                                         |
|                  | tRNA genes                          | <i>trnA-UGC, trnC-GCA, trnD-GUC, trnE-UUC trnF-GAA, trnI-M-CAU, trnG-UCC, trnH-GUG, trnI-CAU, trnI-GAU, trnK-UUU, trnL-CAA, trnL-UAA, trnL-UAG, trnM-CAU, trnN-GUU, trnP-GGG, trnP-UGG, trnQ-UUG, trnR-ACG, trnR-UCU, trnS-GCU, trnS-GGA, trnS-UGA, trnT-GGU, trnT-UGU, trnV-GAC, trnV-UAC, trnW-CCA, trnY-GUA</i> |
| Photosynthesis   | Photosystem I                       | <i>psaA, B, C, I, J</i>                                                                                                                                                                                                                                                                                            |
|                  | Photosystem II                      | <i>psbA, B, C, D, E, F, G, H, I, J, K, L, M, N, T, Z</i>                                                                                                                                                                                                                                                           |
|                  | NadH oxidoreductase                 | <i>ndhA, B, C, D, E, F, G, H, I, J, K</i>                                                                                                                                                                                                                                                                          |
|                  | Cytochrome b6/f complex             | <i>petA, B, D, G, L, N</i>                                                                                                                                                                                                                                                                                         |
|                  | ATP synthase                        | <i>atpA, B, E, F, H, I</i>                                                                                                                                                                                                                                                                                         |
|                  | Rubisco                             | <i>rbcl</i>                                                                                                                                                                                                                                                                                                        |
| Other genes      | Maturase                            | <i>matK</i>                                                                                                                                                                                                                                                                                                        |
|                  | Protease                            | <i>clpP</i>                                                                                                                                                                                                                                                                                                        |
|                  | Envelop membrane protein            | <i>cemA</i>                                                                                                                                                                                                                                                                                                        |
|                  | Subunit Acetyl-CoA-Carboxylate      | <i>accD</i>                                                                                                                                                                                                                                                                                                        |
|                  | c-type cytochrome synthesis gene    | <i>ccsA</i>                                                                                                                                                                                                                                                                                                        |
| Unknown          | Conserved Open reading frames       | <i>ycf1,2, 3, 15</i>                                                                                                                                                                                                                                                                                               |

<https://doi.org/10.1371/journal.pone.0182281.t005>

The *G. soja* genome map (Fig 1) was representative of known *Glycine* plastomes in general, and no structural rearrangement was detected among these plastomes. The length of the *G. soja* plastome was 152,224 bp, which is similar to that of *G. max* (152,217 bp) [35], but smaller than those of *G. dolichocarpa*, *G. falcata*, *G. sydetika*, and *G. tomentella* (Table 1). Among the sequenced *Glycine* plastomes, that of *G. max* is smallest, and that of *G. dolichocarpa* is largest (Table 1). Furthermore, a total of 134 genes were identified in the *G. soja* plastome, of which 110 were unique, including 87 protein-coding genes, 39 tRNA genes, and eight rRNA genes (Fig 1, Table 5). Similar to other legumes, the plastome of *G. soja* lacked the *rpl22* gene, probably due to an ancient transfer to the nuclear genome [59]. The duplicated IR regions of the *G. soja* plastome resulted in complete duplication of the *rpl2*, *rpl23*, *ycf2*, *ycf15*, *ndhB*, and *rps7* genes as well as duplication of exons 1 and 2 of *rps12*, all four rRNA genes, and seven tRNA genes. The LSC region included 61 protein-coding and 24 tRNA genes, whereas the SSC region included only 12 protein-coding genes and one tRNA gene. The protein-coding genes included nine genes encoding large ribosomal proteins (*rpl2*, *14*, *16*, *20*, *22*, *23*, *32*, *33*, and *36*), 12 genes encoding small ribosomal proteins (*rps2*, *3*, *4*, *7*, *8*, *11*, *12*, *14*, *15*, *16*, *18*, and *19*), five genes encoding photosystem I components (*psaA*, *B*, *C*, *I*, and *J*), 16 genes related to photosystem II (Table 5), and six genes encoding ATP synthase and electron transport chain components (*atpA*, *B*, *E*, *F*, *H*, and *I*; Table 5).

Among the coding genes, *rps12* was unequally divided, with its 5' exon being located in the LSC region and one copy of the 3' exon and intron being located in each of the IR regions, as in other angiosperms. The *ycf1* gene was located at the IRa/SSC boundary, leading to incomplete duplication of the gene within the IR regions. We also identified 12 intron-containing



**Table 6. Length of exons and introns in intron-containing genes from the *Glycine soja* plastid genome.**

| Gene                     | Location | Exon I (bp) | Intron 1 (bp) | Exon II (bp) | Intron II (bp) | Exon III (bp) |
|--------------------------|----------|-------------|---------------|--------------|----------------|---------------|
| <i>atpF</i>              | LSC      | 144         | 736           | 414          |                |               |
| <i>clpP</i>              | LSC      | 69          | 710           | 297          | 775            | 225           |
| <i>ndhA</i>              | SSC      | 552         | 1269          | 756          |                |               |
| <i>ndhB<sup>a</sup></i>  | IR       | 777         | 692           | 756          |                |               |
| <i>petB</i>              | LSC      | 6           | 808           | 642          |                |               |
| <i>petD</i>              | LSC      | 8           | 728           | 476          |                |               |
| <i>rpl2<sup>a</sup></i>  | IR       | 393         | 681           | 468          |                |               |
| <i>rpl16</i>             | LSC      | 9           | 1165          | 402          |                |               |
| <i>rpoC1</i>             | LSC      | 441         | 785           | 1638         | 719            | 159           |
| <i>rps12<sup>*</sup></i> |          | 114         | -             | 26           | 531            | 232           |
| <i>rps16</i>             | LSC      | 39          | 887           | 228          |                |               |
| <i>ycf3</i>              | LSC      | 126         | 697           | 228          | 745            | 150           |
| <i>trnA-UGC</i>          | IR       | 38          | 810           | 35           |                |               |
| <i>trnI-GAU</i>          | IR       | 42          | 948           | 35           |                |               |
| <i>trnL-UAA</i>          | LSC      | 37          | 508           | 50           |                |               |
| <i>trnK-UUU</i>          | LSC      | 37          | 2583          | 29           |                |               |
| <i>trnV-UAC</i>          | LSC      | 39          | 586           | 37           |                |               |

<sup>a</sup> replicated genes

\*The *rps12* coding sequence is split between 5'-*rps12* and 3'-*rps12*, which are located in the large single-copy region and inverted repeat region, respectively.

<https://doi.org/10.1371/journal.pone.0182281.t006>

genes, including nine that contained a single intron and three (*ycf3*, *clpP*, and *rps12*) that contained two introns (Table 6). This is in contrast to the situation in *Cicer arietinum*, *Medicago truncatula*, *Trifolium subterraneum*, *Pisum sativum*, and *Lathyrus sativus*, all of which have lost an intron from both *clpP* and *rps12* [19]. The largest intron was found in *trnK-UUU* (2583 bp) and included the entire *matK* gene, whereas *trnL-UAA* contained the smallest intron (508 bp). Introns play an important role in the regulation of gene expression, and recent research has shown that introns can improve exogenous gene expression when located at specific positions. Therefore, introns can be a valuable tool for improving transformational efficiency [60]. Furthermore, intron sequences in legume chloroplast DNA have become important tools in phylogenetic analyses [61]. In addition, even though *ycf1* and *ycf2* [62, 63], *rpl23* [64], and *accD* [65, 66] are often absent in plants [64], they have been reported to occur the plastomes of various *Glycine* species [67]. *atpB-atpE* pairs were observed to overlap with each other by ~1 bp. However, *psbC-psbD* exhibited a 53-bp overlap in *G. soja* plastomes, similar to what is observed in *G. max* [35] and *G. falcata* [67], *Arabidopsis arenosa* (17-bp overlap) [68], *Gossypium* (53-bp overlap) [69], and *Camellia* (52-bp overlap) [70]. Previously, Addachi et al. (2012) [71] reported the importance of the partial overlap of *psbC* and *psbD* cistrons. They demonstrated that the translation of the *psbC* cistron largely depends on the translation of the preceding *psbD* cistron, indicating a contribution form independent *psbC* translation. Similar results were reported in tobacco, where *ndhC* and *ndhK* cistrons overlap, and *ndhK* translation is strictly dependent on the upstream termination codon [72].

### Repeat sequence content

Repeat analysis of the *G. soja* plastome identified 34 palindromic repeats, 15 forward repeats, and 25 tandem repeats (Fig 2A). Among these repeats, 12 of the forward repeats were 30–44

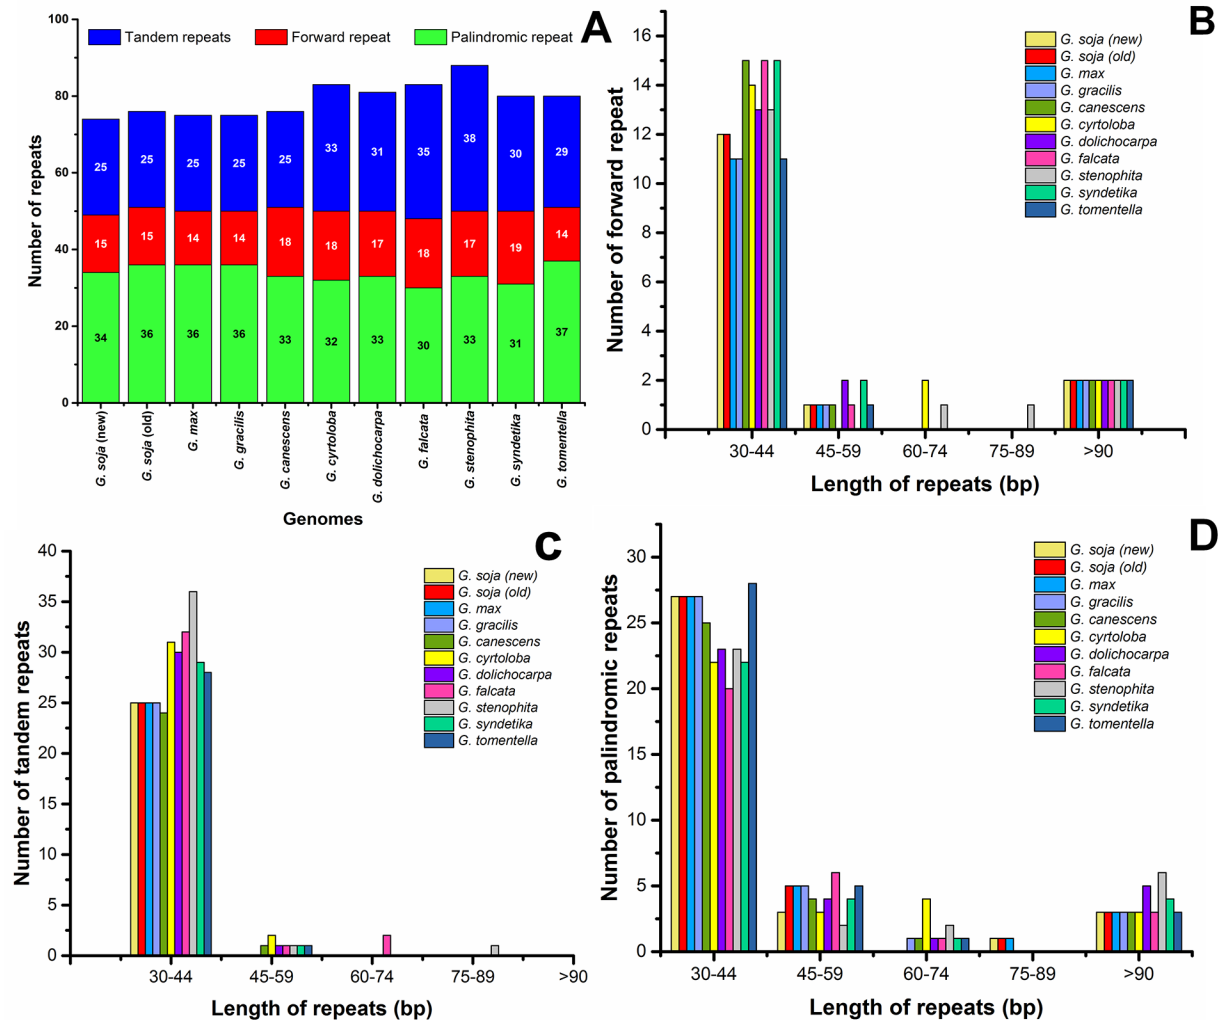

**Fig 2. Analysis of repeated sequences in 10 *Glycine* plastid genomes.** A, Total of three repeat types; B, Length distribution of forward repeat sequences; C, Length distribution of tandem repeat sequences; D, Length distribution of palindromic repeat sequences.

<https://doi.org/10.1371/journal.pone.0182281.g002>

bp in length, while all 25 tandem repeats were 15–29 bp in length (Fig 2A–2D). Similarly, 27 of the palindromic repeats were 30–44 bp in length, and three repeats were 45–59 bp in length (Fig 2D). Overall, 74 repeats were identified in the *G. soja* plastome, which is a similar number to the 75, 75, 76, 83, 81, 83, 88, 80, and 80 repeat sequences found in the plastomes of *G. max*, *G. gracilis*, *G. canescens*, *G. cyrtoloba*, *G. dolichocarpa*, *G. falcata*, *G. stenophita*, *G. syndetika*, and *G. tomentella*, respectively (Fig 2A). Therefore, *G. soja* is more similar to *G. max* and *G. gracilis* in terms of repeats. Approximately 29.4% of these repeats were distributed in protein-coding regions. Previous reports suggest that repeat sequences, which contribute to genome rearrangements, can be very helpful in phylogenetic studies [58, 73]. In addition, analyses of various plastomes have shown that repeat sequences induce indels and substitutions [74], and both sequence variation and genome rearrangement occur as a result of slipped-strand mispairing and improper recombination of such repeat sequences [73, 75, 76]. Furthermore, the presence of repeat sequences indicates that loci are hotspots for genome reconfiguration

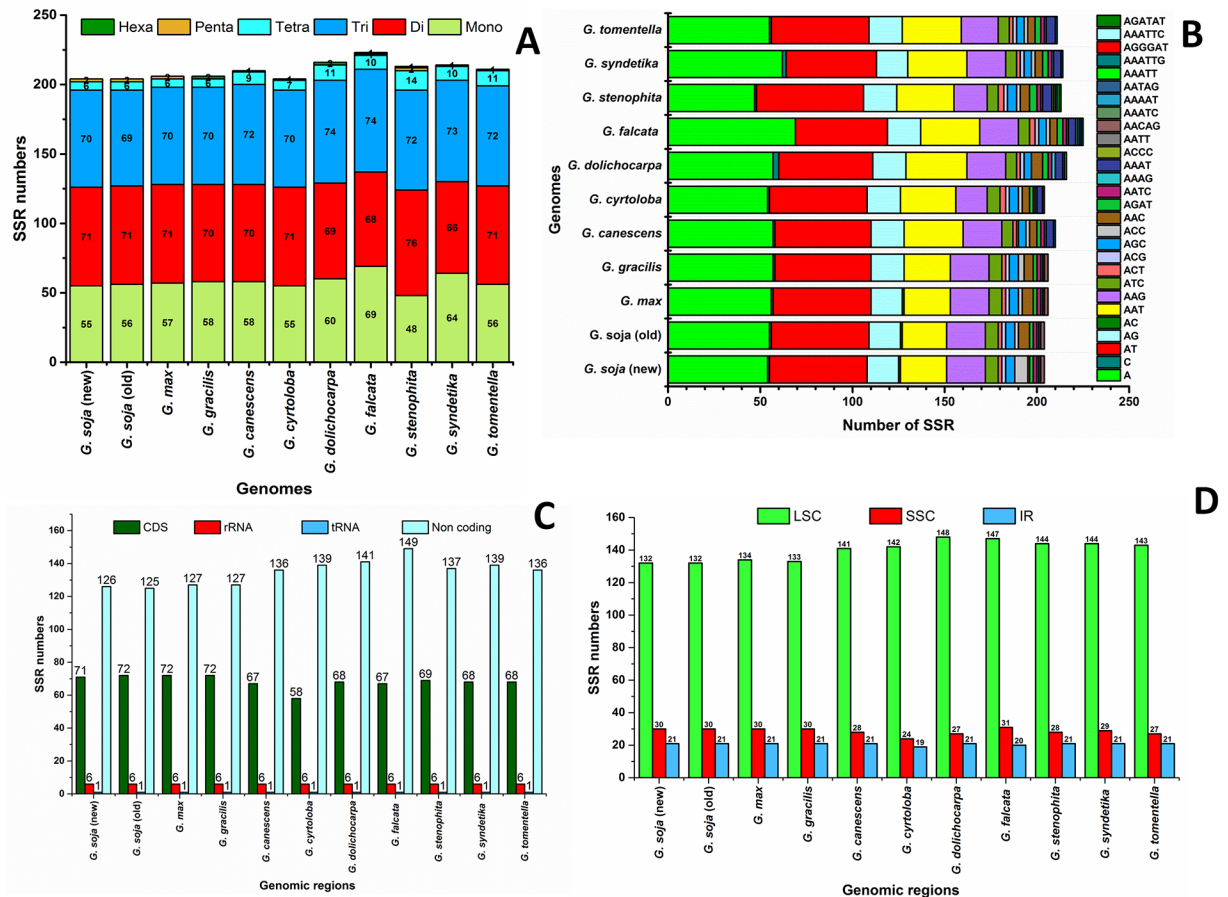

**Fig 3. Analysis of simple sequence repeats (SSRs) in the ten *Glycine* plastid genomes.** A, Number of SSR types; B, Frequency of identified SSR motifs in different repeat class types; C, Frequency of identified SSRs in coding regions; D, Frequency of identified SSRs in the small single-copy (SSC), large simple-copy (LSC), and inverted repeat (IR) regions.

<https://doi.org/10.1371/journal.pone.0182281.g003>

[58, 77], and repeats can be used to develop genetic markers for phylogenetic and population studies [58].

### SSR content

Simple sequence repeats (SSRs), or microsatellites, are repeating sequences, typically of 1–6 bp in length, that are distributed throughout the genome. In the present study, we identified perfect SSRs in the plastome of *G. soja* and in those of nine other *Glycine* species (Fig 3A). Certain parameters were set because SSRs of 10 bp or longer are prone to slipped-strand mispairing, which is believed to be the main mechanism of the formation of SSR polymorphisms [78–80].

A total of 204 perfect microsatellites were identified in the *G. soja* plastome (Fig 3A), which is a similar number to the 206, 206, 210, 204, 216, 223, 213, 214, and 211 perfect microsatellites identified in the plastomes of *G. max*, *G. gracilis*, *G. canescens*, *G. cyrtoloba*, *G. dolichocarpa*, *G. falcata*, *G. stenophita*, *G. syndetika*, and *G. tomentella*, respectively (Fig 3A). The majority of the SSRs possessed dinucleotide repeat motifs, varying in number from 66 in *G. soja* to 76 in *G. falcata* and *G. dolichocarpa*, while trinucleotide SSRs were the second most common, ranging in number from 69 in *G. syndetika* to 74 in *G. stenophita*. Using our search criterion, two pentanucleotide SSRs were identified in *G. soja*, *G. max*, and *G. stenophita*,

and two hexanucleotide SSRs were identified in *G. gracilis* and *G. dolichocarpa* (Fig 3A). In *G. soja*, the majority of the mononucleotide SSRs were A (98.1%) and C (1.81%) motifs, and the majority dinucleotide SSRs were A/T (71.64%) and A/G (23.940%) motifs (Fig 3B, Table 7). In addition, 61.7% of the SSRs were located in non-coding regions, whereas 2.9% and 0.49% were located in rRNA and tRNA genes, respectively (Fig 3C). Further analysis indicated that 64.7% of the SSRs were located in the LSC region, whereas 20.58% and 14.7% were located in the IR and SSC regions, respectively (Fig 3D). These results are similar to previous reports that SSRs are unevenly distributed in plastomes, and the findings might provide more information for selecting effective molecular markers for detecting intra- and interspecific polymorphisms [81–84]. Furthermore, most of the mono- and dinucleotide repeats consisted of A and T, which may have contributed to the bias in base composition, as in the plastomes of other species [85]. Our findings are comparable to previous reports that SSRs in plastomes are generally composed of polythymine (polyT) or polyadenine (polyA) repeats and infrequently contain tandem cytosine (C) or guanine (G) repeats [86], thereby contributing to AT richness [55, 56, 86].

### Sequence and structural divergence of *Glycine* plastid genomes

Ten complete *Glycine* plastomes were compared with the *G. soja* plastome. Analysis of genes with known functions indicated that *G. soja* shared 76 protein-coding genes with nine *Glycine* species. In addition, the gene content and organization of the *G. soja* plastome were similar to those of other *Glycine* species plastomes [67], but different from the usual gene order of angiosperm plastomes, due to a large inversion (~51 kb) that reversed the order of the genes between *trnK* and *accD* (Fig 1). This 51-kb inversion was previously reported in other members of the legume family, especially members of subfamily Papilionoideae [16, 24, 87], and other inversions have been reported in the plastomes of other species, including a 5.6-kb inversion in *Milletia* [88], a 78-kb inversion in various closely related legumes, including *Phaseolus* and *Vigna* [17, 89], and a 36-kb inversion within the 51-kb inversion found in *Lupinus* and other genisotoids [90]. This change in gene order has been ascribed to the contraction and expansion of IR regions, leaving the gene order as described in papilionoids, retaining the 51-kb inversion, but alerting the genes bordering the IR region [89, 91].

Furthermore, the IR region overlaps the *ycf1* gene by 478 bp, as observed in legumes exhibiting the same inverted repeat as *G. soja*. This feature has been shown to distinguish the plastomes of legumes from those of other angiosperms, in which the IR region and *ycf1* typically overlap by 1,000 bp [35]. Moreover, as found in the plastomes of other legumes, the plastome of *G. soja* possessed variation and was missing two cp genes, *rpl22* and *infA*, [18], both of which have been replaced by cp-targeting nuclear copies [59, 92]. Absence of the *rps16* gene from the plastome has also been reported in other legume lineages, excluding *Glycine*, and the mitochondrial copy is dually targeted to both the cp and mitochondria [19, 93]. Furthermore, loss of the introns in *rps12* and *clpP* has been detected in the plastomes of various species [19], including those of *Glycine* species [35, 67].

Pairwise alignment of the new *G. soja* plastome with the old *G. soja* plastome and those of nine other genomes showed a high degree of synteny. The annotation of the new *G. soja* plastome was used as a reference for plotting the overall sequence identity of the plastomes of the other ten *Glycine* species in mVISTA (Fig 4). In the results, relatively lower sequence identity was observed between the plastomes of the seven other perennial species, especially in the *rpoC1*, *atpF*, *accD*, *clpP*, *rpl2*, *ndhA*, *ndhF*, *rps8*, *rps19*, and *ycf1* genes (Fig 4). In addition, the LSC and SSC regions were less similar than the two IR regions in all *Glycine* species, and the non-coding regions were more divergent than the coding regions. Highly divergent regions

**Table 7. Simple sequence repeats (SSRs) in the *Glycine soja* plastid genome.**

| Unit         | Length | No. | SSR start                                                                                                                                                                                 |
|--------------|--------|-----|-------------------------------------------------------------------------------------------------------------------------------------------------------------------------------------------|
| <b>A</b>     | 18     | 1   | 51,531                                                                                                                                                                                    |
|              | 16     | 2   | 92,627, 142,764                                                                                                                                                                           |
|              | 15     | 2   | 76,538, 119,451                                                                                                                                                                           |
|              | 14     | 2   | 33,433, 82,862                                                                                                                                                                            |
|              | 13     | 4   | 24,610, 51701, 110,244, 111,377                                                                                                                                                           |
|              | 12     | 7   | 6,968, 9,644, 9,656, 58,365, 62,260, 75,661, 82,660                                                                                                                                       |
|              | 11     | 15  | 14,313, 42,712, 54,965, 59,329, 70698, 78,955, 79,488, 81,034, 81,302, 10,9835, 111,046, 111,519, 111,927, 112,225, 122,146                                                               |
|              | 10     | 22  | 2,991, 4,452, 7,568, 25,542, 31,495, 34,893, 38,160, 38,510, 45,234, 46,902, 54,259, 56,682, 62,419, 66,716, 67,450, 69,278, 93297, 109,698, 110,547, 114,419, 124,220, 142,100           |
| <b>C</b>     | 12     | 1   | 9644                                                                                                                                                                                      |
| <b>AT</b>    | 19     | 1   | 5,177                                                                                                                                                                                     |
|              | 17     | 1   | 5,159                                                                                                                                                                                     |
|              | 16     | 1   | 24,676                                                                                                                                                                                    |
|              | 14     | 1   | 32,841                                                                                                                                                                                    |
|              | 13     | 1   | 48,415                                                                                                                                                                                    |
|              | 12     | 2   | 54,297, 118,666                                                                                                                                                                           |
|              | 11     | 8   | 33,695, 48,440, 65,081, 67,502, 68,320, 78,342, 79,508, 122,331                                                                                                                           |
|              | 10     | 5   | 31,746, 32,806, 68,072, 80,714, 116,632                                                                                                                                                   |
|              | 9      | 9   | 13,837, 35,671, 54,930, 58,400, 60,678, 64,792, 69,490, 82,699, 120,175                                                                                                                   |
|              | 8      | 24  | 100, 1,607, 2,068, 3,635, 4,513, 4,526, 13,370, 16,835, 28,206, 47,399, 51,596, 51,773, 51,795, 58,249, 60,155, 65,092, 69,374, 76,625, 79,531, 82,378, 92,346, 116,291, 123,690, 143,053 |
| <b>AG</b>    | 9      | 2   | 25,492, 28,221                                                                                                                                                                            |
|              | 8      | 15  | 3,673, 6,261, 85,791, 86,793, 94,040, 105,226, 105,546, 107,047, 120,875, 128,352, 129,853, 130,173, 141,359, 148,606, 149,608                                                            |
| <b>AC</b>    | 9      | 1   | 120,511                                                                                                                                                                                   |
| <b>AAT</b>   | 15     | 1   | 28,637                                                                                                                                                                                    |
|              | 13     | 1   | 14,614                                                                                                                                                                                    |
|              | 12     | 1   | 29,635                                                                                                                                                                                    |
|              | 11     | 1   | 73,972                                                                                                                                                                                    |
|              | 10     | 6   | 2,980, 14,647, 23,469, 47,482, 61,211, 83,153                                                                                                                                             |
|              | 9      | 15  | 4,840, 6,885, 18,582, 24,528, 28,614, 32,259, 32,318, 45,719, 47,151, 58,337, 80,973, 99,425, 115,619, 120,102, 135,973                                                                   |
| <b>AAG</b>   | 12     | 1   | 2,123                                                                                                                                                                                     |
|              | 11     | 1   | 111,544                                                                                                                                                                                   |
|              | 10     | 4   | 83,359, 95,785, 139,612, 152,038                                                                                                                                                          |
|              | 9      | 15  | 23,601, 39,016, 61,479, 69,713, 76,888, 89,691, 91,515, 94,335, 102,444, 109,943, 117,624, 133,154, 141,063, 143,883, 145,707                                                             |
| <b>ATC</b>   | 11     | 1   | 57,126                                                                                                                                                                                    |
|              | 9      | 6   | 22,369, 40,828, 45,626, 83,824, 116,434, 151,574                                                                                                                                          |
| <b>ACG</b>   | 10     | 2   | 83,313, 152,084                                                                                                                                                                           |
| <b>AGC</b>   | 9      | 5   | 5,366, 20,175, 68,568, 103,665, 131,733                                                                                                                                                   |
| <b>ACC</b>   | 9      | 2   | 58,920, 90,061                                                                                                                                                                            |
| <b>ACT</b>   | 9      | 1   | 66,702                                                                                                                                                                                    |
| <b>AGAT</b>  | 15     | 2   | 18,423, 18,450                                                                                                                                                                            |
| <b>AATC</b>  | 13     | 1   | 119,923                                                                                                                                                                                   |
|              | 12     | 1   | 78,291                                                                                                                                                                                    |
| <b>AAAG</b>  | 12     | 1   | 67,682                                                                                                                                                                                    |
| <b>AAAT</b>  | 12     | 1   | 117,190                                                                                                                                                                                   |
| <b>AACAG</b> | 15     | 2   | 107,707, 127,685                                                                                                                                                                          |

<https://doi.org/10.1371/journal.pone.0182281.t007>

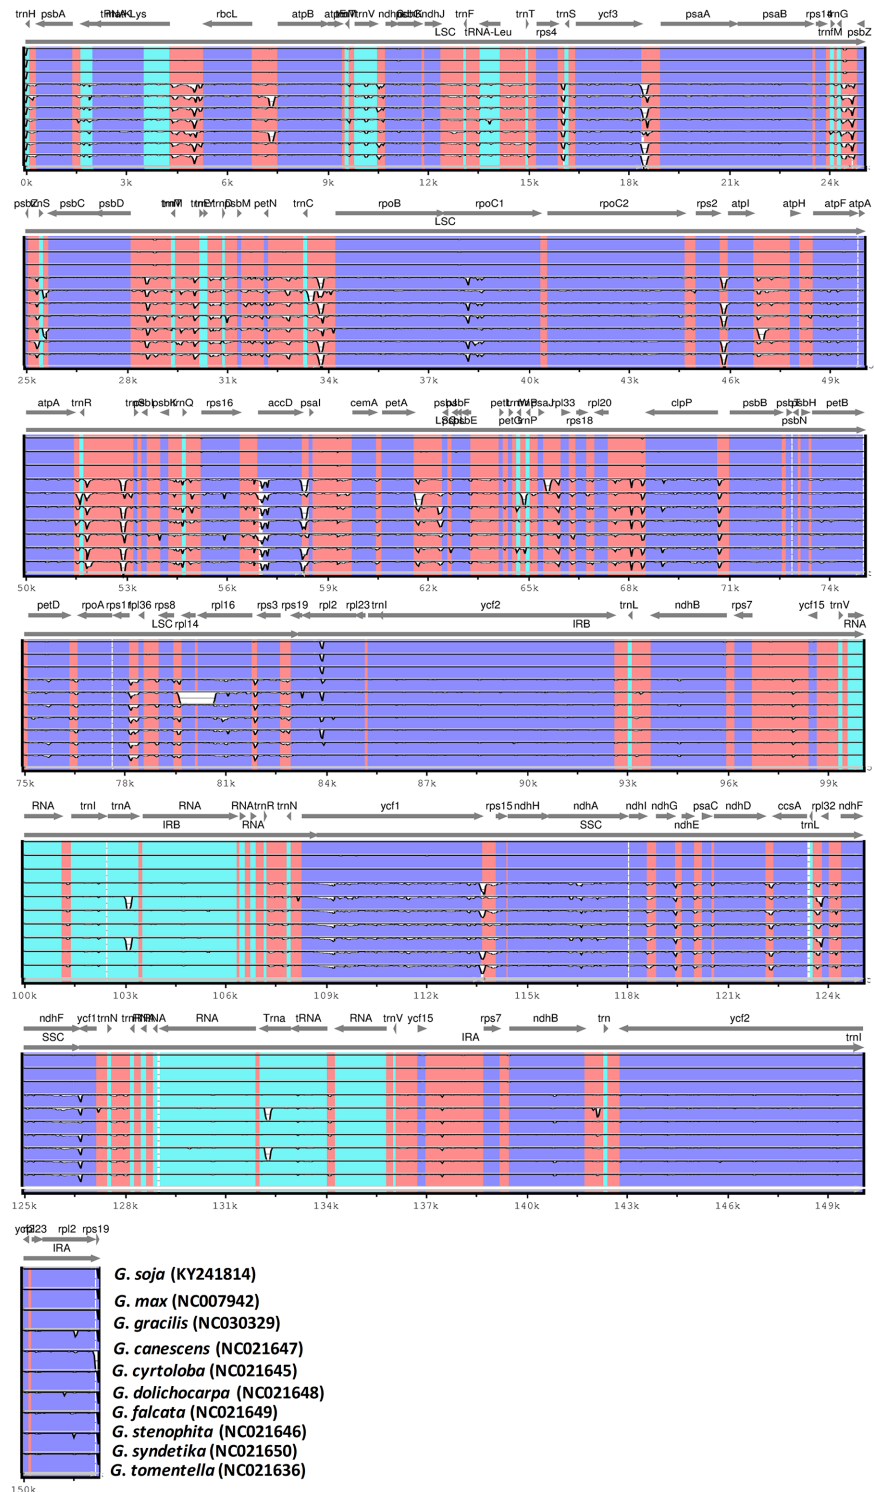

**Fig 4. Visual alignment of plastid genomes from *Glycine soja* (new and old) and nine other *Glycine* species.** VISTA-based identity plot showing the sequence identity among the ten *Glycine* species, using *G. soja* (new) as a reference. Vertical scale indicates the percentage of identity, ranging from 50% to 100%. Horizontal axis indicates the coordinates within the chloroplast genome. Arrows indicate the annotated genes and their transcriptional direction. A thick black line indicates the inverted repeat (IR) regions.

<https://doi.org/10.1371/journal.pone.0182281.g004>

included the *matK-rbcL*, *ycf3-psaA*, *trnC-rpoB*, *rpl20-clpP*, *rps16-trnQ*, *trnFM-trnM*, *psbM-petN*, *atpI-atpH*, *petA-psbJ*, and *ycf1-rps15* spacers, as reported previously [54, 55]. Our results also confirmed similar differences among various coding regions in the analysed species, as suggested by Kumar et al. [94]. On the other hand, *G. soja* exhibited high sequence identity with annual *Glycine* species (S1 Fig), which suggest that they are highly conserved. However, the variation in similarity levels revealed various coding and non-coding regions where the *G. soja* exhibits divergence from these annual *Glycine* species (S1 Fig). Similarly, we detected 10 relatively highly variable regions, including 4 gene regions and 6 intergenic regions of the cp genomes, that might be undergoing more rapid nucleotide substitution at species and cultivar levels (S2 Fig) (*atpB-rbcL*, *trnT-trnL*, *trnS(GGA)-trnG(UCC)*, *psbD-trnT*, *rps16*, *rpl33-rpl18*, *rpl16-rps3*, *ndhB*, *ycf1* and *ycf15*). These regions can be used as potential molecular markers for application in phylogenetic analyses of *Glycine*. Furthermore, various researchers have determined coding and non-coding regions of particularly high variability as potential molecular markers for *Glycine* species, such as *trnS(GGA)-trnG(UCC)*, *rpl16-rps3*, *trnT-trnL* and *atpB-rbcL* [95–97]. Similarly, it has been reported that non-coding regions in cp DNA show greater variability in nucleotide regions than coding regions, and these regions have become a major source of variability for phylogenetic studies in various species, including studies within *Glycine* species [98–100]. Furthermore, comparison of the plastomes of *G. soja* and related species revealed 72 SNPs and 26 indels in relation to *G. max* and *G. gracilis*, respectively (S2 Table). These results confirmed that the highly conserved plastome can include interspecific mutations that may be useful for analysing both genetic diversity and phylogenetic relationships.

Similarly, we calculated the average pairwise sequence divergence among the plastomes of the ten *Glycine* species (S3 Table). The plastome of *G. soja* exhibited an average sequence divergence of 0.0096, whereas that of *G. cyrtoloba* possessed the highest average sequence divergence (0.00567), and those of *G. soja* and *G. max* displayed the lowest average sequence divergence (0.00010 and 0.00020, respectively). Furthermore, the nine most divergent genes among these genomes were *accD*, *matK*, *ycf1*, *rps16*, *rpl20*, *psbM*, *psbN*, *petL*, and *petN*. The *accD* gene exhibited the greatest average sequence divergence (0.07825), followed by *ycf1* (0.0241), *rps16* (0.0201), and *matK* (0.0194; Fig 5), most of which were located in the LSC region, and the *accD* gene of *G. soja* was highly divergent from those of nine other *Glycine* species (S3 Fig). The highest nucleotide diversity ( $\Pi$ ) (0.0916) and total number of mutations ( $\Sigma$ ) (119 bp) in comparison with the *G. soja accD* gene was observed in *G. cyrtoloba* among the plastomes of the nine *Glycine* species, whereas the lowest were observed in *G. syndetika* (S4 Table). The length of the *accD* gene was 1,299 bp (433 aa) in *G. soja*, *G. max*, and *G. gracilis* and 1527 bp (523 aa) in the seven other *Glycine* species (S3 Fig). Similar differences in gene length within small cpDNA regions have been observed in a variety of other angiosperms [21]. In legume species, both *ycf4* and *accD* exhibit extensive length variation. The expansion of the *accD* gene is partly explained by the presence of numerous tandemly repeated sequences [21]. This *accD* gene encodes a subunit of acetyl-CoA carboxylase, which is related to fatty acid synthesis within the plastid. Previous gene knockout experiments have shown that the function of *accD* is vital, and this gene is expected to be indispensable [101]. However, various studies have identified widespread pseudogenization or absence of *accD* in a variety of relatively distant lineages, including the Ericaceae, Campanulaceae, Geraniaceae, Acoraceae, Poaceae, and Fabaceae [10, 21, 102–106], which implies that deletion or pseudogenization events occur independently.

## Boundaries between single-copy and IR regions

Variations in the size of angiosperm plastomes are mostly the result of expansion or contraction of the IR regions [79, 107–109]. In the present study, a detailed comparison of the four

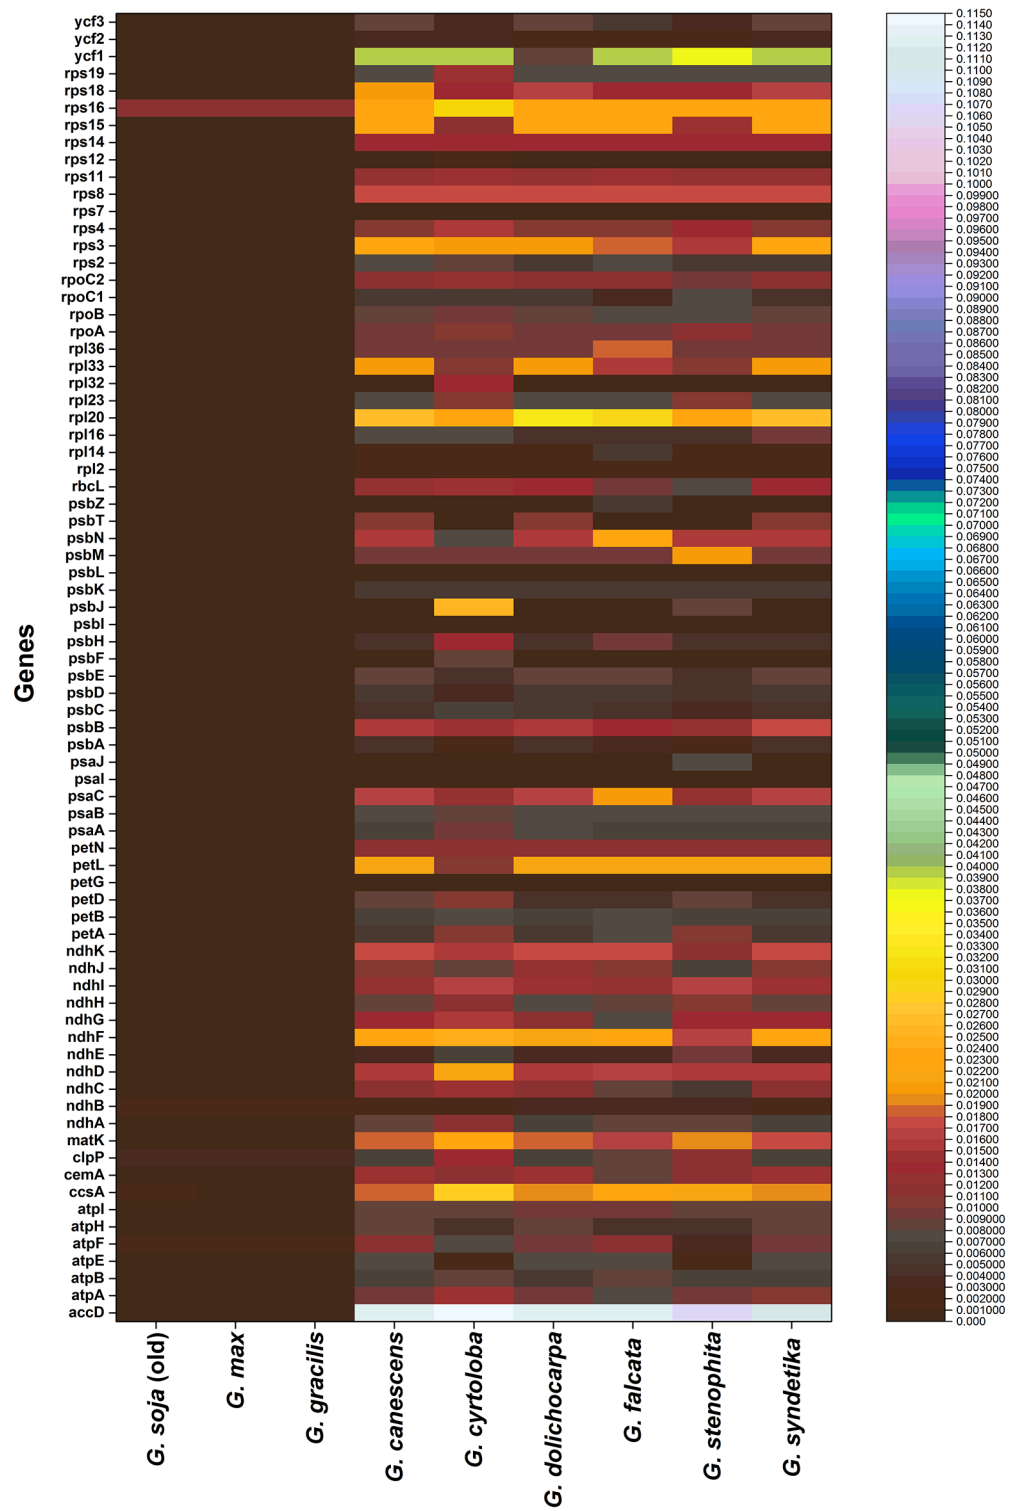

Fig 5. Pairwise distance of 76 genes from *Glycine soja* (new and old) and nine other *Glycine* species.

<https://doi.org/10.1371/journal.pone.0182281.g005>



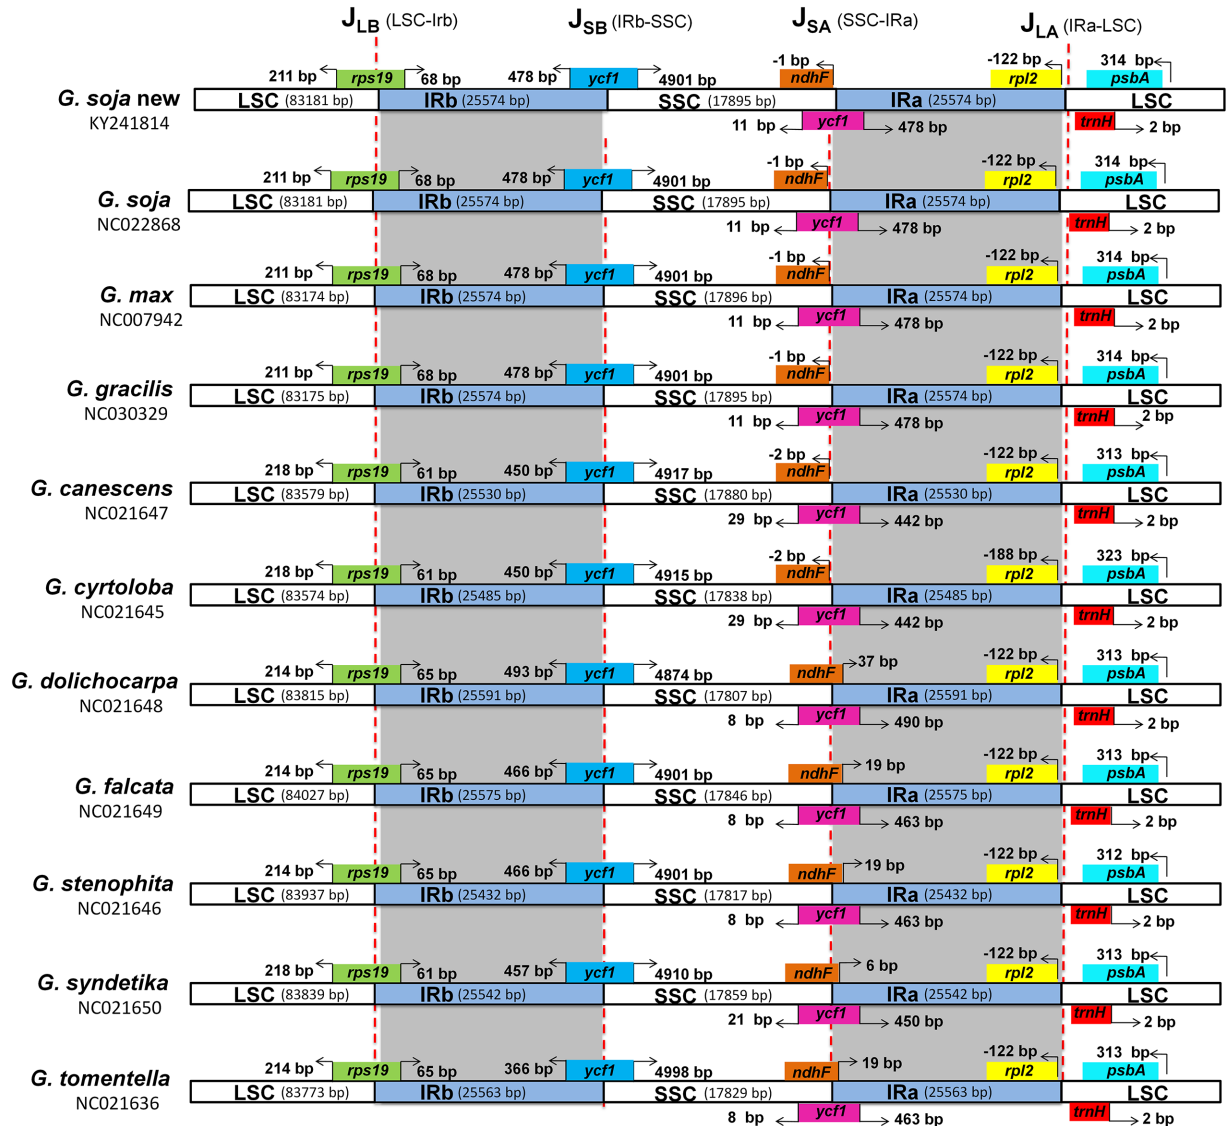

**Fig 6. Distance between adjacent genes and junctions of the small single-copy (SSC), large single-copy (LSC), and two inverted repeat (IR) regions of the plastid genomes from ten *Glycine* species.** Boxes above and below the main line indicate the adjacent bordering genes. The figure is not to scale in regard to sequence length and only shows relative changes at or near the IR/SC borders.

<https://doi.org/10.1371/journal.pone.0182281.g006>

junctions ( $J_{LA}$ ,  $J_{LB}$ ,  $J_{SA}$ , and  $J_{SB}$ ) between the two IR regions (IRa and IRb) and the two single-copy regions (LSC and SSC) of the 10 *Glycine* species was performed (Fig 6). Despite the similar lengths of the IR regions of *G. soja* and the other nine *Glycine* species, some expansion and contraction were observed, with the IR regions ranging from 25,432 bp in *G. stenophita* to 25,591 bp in *G. dolichocarpa*. The genes that marked the beginnings and ends of the IR regions were only partially duplicated, including 68 bp of *rps19* in *G. soja*, *G. max*, and *G. gracilis* and 65 bp of *rps19* in *G. dolichocarpa*, *G. falcata*, *G. stenophita*, and *G. tomentella*. In *G. canescens*, *G. syndetika*, and *G. cyrtoloba*, this distance was 61 bp in IR region from  $J_{LB}$ . Similarly, the hypothetical cp gene *ycf1* was partially duplicated, with 478 bp of this sequence being duplicated in *G. soja*, *G. max*, and *G. gracilis*; 463 bp in *G. falcata*, *G. stenophita*, and *G. tomentella*; and 442 bp in *G. canescens* and *G. cyrtoloba*.  $J_{LA}$  was located between *rpl2* and *psbA*, and the

distance between *rpl2* and  $J_{LA}$  was 122 bp in all of the species except for *G. cyrtoloba*, where *rpl2* is located 188 bp from the  $J_{LA}$  border. Additionally, the distance between *psbA* and the  $J_{LA}$  in the *G. soja* plastome was 314 bp, which was similar to that in the *G. max* and *G. gracilis* plastomes. Furthermore, the *ndhF* gene traversed the SSC and IRa regions, with 1 bp being located in the IR region of *G. soja*, 37 bp being located in the IR region of *G. dolichocarpa*, and 19 bp being located in the IR region of *G. falcata* and *G. stenophita* (Table 7).

## Phylogenetic relationships among *Glycine* species

Plastid genomes have been useful in phylogenetic, evolutionary, and molecular studies. During the last decade, many analyses based on the comparison of plastid protein-coding genes [110, 111] and complete genome sequences [112] have addressed phylogenetic questions at deep nodes and enhanced our understanding of enigmatic evolutionary relationships among angiosperms. The genus *Glycine* includes 28 species, separated into two subgenera (*Soja* and *Glycine*), the former of which includes both cultivated soybean (*G. max*) and its wild annual progenitor (*G. soja*), which are distributed in East Asia, including Japan, Korea, China, Russia, and Taiwan. *G. max* and *G. soja* are both diploid ( $2n = 40$ ) and interfertile and are thought to share highly similar genetic variation, although *G. soja* is much more variable than *G. max* [25, 113]. Polymorphisms in the cpDNA of *G. max* and *G. soja* have been used in numerous studies to assess maternal lineages and cytoplasmic diversity [114–119]. Continued efforts have expanded our ability to differentiate and understand the genomic structure and phylogenetic relationships of *Glycine* species [28, 120, 121]. The phylogeny and taxonomy of *Glycine* species in the *Soja* subgenus have been extensively investigated based on DNA variation, including nucleotide variation in nuclear ribosomal DNA (rDNA), intergenic spacer (ITS) regions [122], cpDNA restriction sites [24, 29], the histone gene H3-D [31], A-199a [123], and cpDNA intergenic spacer regions [25]. However, the complete genome sequence provides more detailed insight [52, 55, 124]. In the present study, the phylogenetic position of *G. soja* within its genus was established using the complete plastomes (S5 Table) and shared genes of 10 *Glycine* species and various methods of phylogenetic analysis. Phylogenetic analysis indicated that the complete plastome and the 76 shared genes contained the same phylogenetic signal. In both datasets, *G. soja* formed a clade with *G. max* and *G. gracilis*, with high BI and bootstrap support values (Fig 7, S4 Fig). Moreover, the tree topology confirmed previously reported relationships based on SSR and plastome data [114, 125]. These results of the present study are in general agreement with the results of Gao and Gao (2016) [37], who reported that *G. gracilis* is intermediate between the two species and is more closely related to *G. max* than *G. soja*. Furthermore, the results of the present study suggest that there is no conflict between the complete genome and the 76 shared gene datasets.

## Conclusions

In the present study, the complete plastome sequence of *G. soja* (152,224 bp) was determined. The gene order and structure of the *G. soja* plastome were found to be highly conserved with the plastomes of other *Glycine* species. The present study also revealed the distribution and location of repeat sequences and SSRs as well as the sequence divergence among the plastomes and shared genes between *G. soja* and nine of its congeners. No major structural rearrangement was observed in relation to annual *Glycine* species. However, in the perennial species, *accD* was found to be the most divergent gene, while relatively lower identity was observed in some other regions, especially in the *rpoCl*, *atpF*, *accD*, and *clpP* genes. Furthermore, phylogenetic analyses based on complete plastomes and shared genes yielded trees with the same topology, at least in regard to the placement of *G. soja*. Thus, the present study provides a

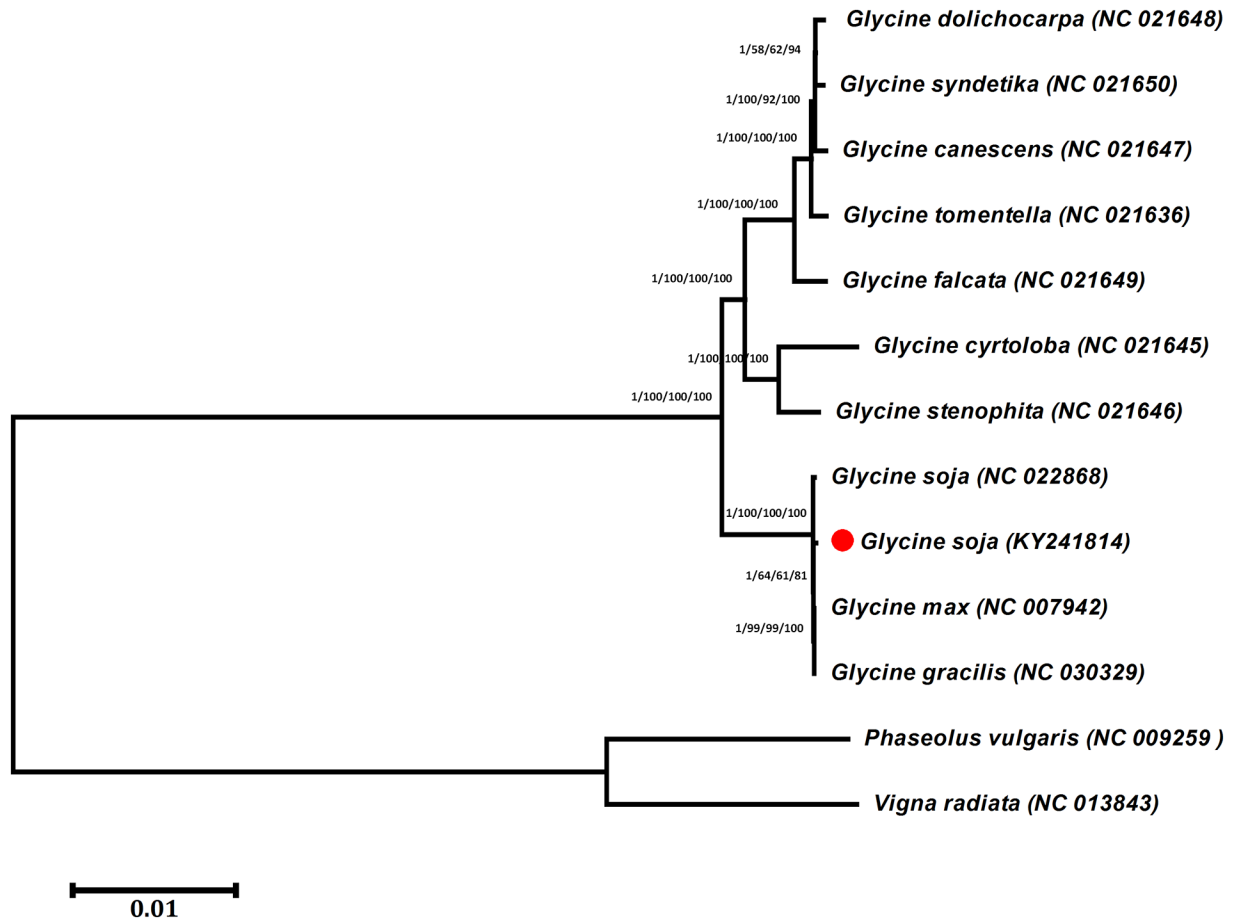

**Fig 7. Phylogenetic trees of ten *Glycine* species.** The whole-genome dataset was analysed using four different methods: neighbour-joining (NJ), maximum parsimony (MP), maximum likelihood (ML), and Bayesian inference (BI). Numbers above the branches represent bootstrap values in the NJ, MP, and ML trees and posterior probabilities in the BI trees. A red dot represents the position of *G. soja* (KY241814).

<https://doi.org/10.1371/journal.pone.0182281.g007>

valuable analysis of the complete plastome of *G. soja* and related species, which may facilitate species identification and both biological and phylogenetic studies.

## Supporting information

**S1 Table. Primers used for gap closing and sequence verification in *Glycine soja*.**

(DOCX)

**S2 Table. Indel and SNP analysis of the plastid genomes of *Glycine soja* (new and old) and nine other *Glycine* species.**

(XLSX)

**S3 Table. Average pairwise distance of plastid sequences from *Glycine soja* (new and old) and nine other *Glycine* species.**

(XLS)

**S4 Table. Comparison of the nucleotide variability ( $P_i$ ) and total number of mutations of the *G. soja* *accD* gene with related species.**

(XLSX)

**S5 Table. Alignment of complete plastomes from *Glycine soja* (new and old) and 9 other *Glycine* species (NEXUS format).**

(ZIP)

**S1 Fig. Visual alignment of plastid genomes from *Glycine soja* (new) with annual *Glycine* speices (*G. soja* (old), *G. max* and *G. gracilis*).** VISTA-based identity plot showing the sequence identity among the ten *Glycine* species, using *G. soja* (new) as a reference. Vertical scale indicates the percentage of identity, ranging from 70% to 100%. Horizontal axis indicates the coordinates within the chloroplast genome. Arrows indicate the annotated genes and their transcriptional direction. A thick black line indicates the inverted repeat (IR) regions.

(TIF)

**S2 Fig. Sliding window analysis of the complete plastome from *Glycine soja* (new) with annual *Glycine* speices (*G. soja* old, *G. max* and *G. gracilis*)** (Window length: 800 bp, step size: 200 bp). X-axis, position of the midpoint of a window; Y- axis, nucleotide diversity of each window.

(TIF)

**S3 Fig. Alignment of *accD* gene nucleotide sequences among 11 *Glycine* species plastomes.**

(JPG)

**S4 Fig. Phylogenetic trees were constructed for ten species from the *Glycine* genus using different methods, and the Bayesian tree for the whole-genome sequences is shown.** The data from the 76 shared genes were analysed with four different methods: joining-joining (NJ), maximum parsimony (MP), maximum likelihood (ML) and Bayesian inference (BI). The numbers above the branches are the bootstrap values from the NJ, MP, and ML methods and the posterior probabilities of BI. A red dot represents the position of *G. soja* (KY241814).

(TIF)

## Author Contributions

**Conceptualization:** Sajjad Asaf, Qari Muhammad Imran.

**Data Curation:** Khdiya Al-Hosni.

**Formal analysis:** Abdul Latif Khan.

**Methodology:** Abdul Latif Khan.

**Resources:** Sang-Mo Kang.

**Software:** Abdul Latif Khan, Qari Muhammad Imran, Sang-Mo Kang, Eun Ju Jeong.

**Supervision:** In-Jung Lee.

**Validation:** Ko Eun Lee, In-Jung Lee.

**Visualization:** Muhammad Aaqil Khan, Sang-Mo Kang.

**Writing – original draft:** Muhammad Aaqil Khan, Sang-Mo Kang, In-Jung Lee.

**Writing – review & editing:** Qari Muhammad Imran.

## References

1. Neuhaus HE, Emes MJ. NONPHOTOSYNTHETIC METABOLISM IN PLASTIDS. *Annu Rev Plant Physiol Plant Mol Biol.* 2000; 51:111–40. Epub 2004/03/12. <https://doi.org/10.1146/annurev.arplant.51.1.111> PMID: 15012188.

2. Rodriguez-Ezpeleta N, Brinkmann H, Burey SC, Roure B, Burger G, Löffelhardt W, et al. Monophyly of primary photosynthetic eukaryotes: green plants, red algae, and glaucophytes. *Curr Biol*. 2005; 15(14):1325–30. Epub 2005/07/30. <https://doi.org/10.1016/j.cub.2005.06.040> PMID: 16051178.
3. Palmer JD. *Plastid chromosomes: structure and evolution* 1991.
4. Henry RJ. *Plant diversity and evolution: genotypic and phenotypic variation in higher plants*: Cabi Publishing; 2005.
5. Martin G, Baurens FC, Cardi C, Aury JM, D'Hont A. The Complete Chloroplast Genome of Banana (*Musa acuminata*, Zingiberales): Insight into Plastid Monocotyledon Evolution. *Plos One*. 2013; 8(6). <https://doi.org/10.1371/journal.pone.0067350> PMID: 23840670
6. Ma J, Yang BX, Zhu W, Sun LL, Tian JK, Wang XM. The complete chloroplast genome sequence of *Mahonia bealei* (Berberidaceae) reveals a significant expansion of the inverted repeat and phylogenetic relationship with other angiosperms (vol 528, pg 120, 2013). *Gene*. 2014; 533(1):458-. <https://doi.org/10.1016/j.gene.2013.09.087>
7. Lee H-L, Jansen RK, Chumley TW, Kim K-J. Gene relocations within chloroplast genomes of *Jasminum* and *Menodora* (Oleaceae) are due to multiple, overlapping inversions. *Mol Biol Evol*. 2007; 24(5):1161–80. <https://doi.org/10.1093/molbev/msm036> PMID: 17329229
8. Wicke S, Schneeweiss GM, dePamphilis CW, Muller KF, Quandt D. The evolution of the plastid chromosome in land plants: gene content, gene order, gene function. *Plant Mol Biol*. 2011; 76(3–5):273–97. <https://doi.org/10.1007/s11103-011-9762-4> PMID: 21424877
9. Kim K-J, Choi K-S, Jansen RK. Two chloroplast DNA inversions originated simultaneously during the early evolution of the sunflower family (Asteraceae). *Mol Biol Evol*. 2005; 22(9):1783–92. <https://doi.org/10.1093/molbev/msi174> PMID: 15917497
10. Haberle RC, Fourcade HM, Boore JL, Jansen RK. Extensive rearrangements in the chloroplast genome of *Trachelium caeruleum* are associated with repeats and tRNA genes. *J Mol Evol*. 2008; 66(4):350–61. <https://doi.org/10.1007/s00239-008-9086-4> PMID: 18330485
11. Greiner S, Wang X, Rauwolf U, Silber MV, Mayer K, Meurer J, et al. The complete nucleotide sequences of the five genetically distinct plastid genomes of *Oenothera*, subsection *Oenothera*: I. Sequence evaluation and plastome evolution. *Nucleic Acids Res*. 2008; 36(7):2366–78. <https://doi.org/10.1093/nar/gkn081> PMID: 18299283
12. Cai Z, Guisinger M, Kim H-G, Ruck E, Blazier JC, McMurtry V, et al. Extensive reorganization of the plastid genome of *Trifolium subterraneum* (Fabaceae) is associated with numerous repeated sequences and novel DNA insertions. *J Mol Evol*. 2008; 67(6):696–704. <https://doi.org/10.1007/s00239-008-9180-7> PMID: 19018585
13. Weng M-L, Blazier JC, Govindu M, Jansen RK. Reconstruction of the ancestral plastid genome in Geraniaceae reveals a correlation between genome rearrangements, repeats and nucleotide substitution rates. *Mol Biol Evol*. 2013:mst257.
14. Guisinger MM, Kuehl JV, Boore JL, Jansen RK. Extreme reconfiguration of plastid genomes in the angiosperm family Geraniaceae: rearrangements, repeats, and codon usage. *Mol Biol Evol*. 2011; 28(1):583–600. <https://doi.org/10.1093/molbev/msq229> PMID: 20805190
15. Wojciechowski MF, Lavin M, Sanderson MJ. A phylogeny of legumes (Leguminosae) based on analysis of the plastid matK gene resolves many well-supported subclades within the family. *Am J Bot*. 2004; 91(11):1846–62. <https://doi.org/10.3732/ajb.91.11.1846> PMID: 21652332
16. Doyle JJ, Doyle JL, Ballenger J, Palmer J. The distribution and phylogenetic significance of a 50-kb chloroplast DNA inversion in the flowering plant family Leguminosae. *Mol Phylogenet Evol*. 1996; 5(2):429–38. <https://doi.org/10.1006/mpev.1996.0038> PMID: 8728401
17. Bruneau A, Doyle JJ, Palmer JD. A chloroplast DNA inversion as a subtribal character in the Phaseoleae (Leguminosae). *Syst Bot*. 1990:378–86.
18. Doyle JJ, Doyle JL, Palmer JD. Multiple independent losses of two genes and one intron from legume chloroplast genomes. *Syst Bot*. 1995:272–94.
19. Jansen RK, Wojciechowski MF, Sanniyasi E, Lee S-B, Daniell H. Complete plastid genome sequence of the chickpea (*Cicer arietinum*) and the phylogenetic distribution of rps12 and clpP intron losses among legumes (Leguminosae). *Mol Phylogenet Evol*. 2008; 48(3):1204–17. <https://doi.org/10.1016/j.ympev.2008.06.013> PMID: 18638561
20. Gantt JS, Baldauf SL, Calie PJ, Weeden NF, Palmer JD. Transfer of rpl22 to the nucleus greatly preceded its loss from the chloroplast and involved the gain of an intron. *The EMBO journal*. 1991; 10(10):3073. PMID: 1915281
21. Magee AM, Aspinall S, Rice DW, Cusack BP, Sémon M, Perry AS, et al. Localized hypermutation and associated gene losses in legume chloroplast genomes. *Genome Res*. 2010; 20(12):1700–10. <https://doi.org/10.1101/gr.111955.110> PMID: 20978141

22. Singh R, Hymowitz T. The genomic relationships among six wild perennial species of the genus *Glycine* subgenus *Glycine* Willd. *Theor Appl Genet.* 1985; 71(2):221–30. <https://doi.org/10.1007/BF00252059> PMID: 24247386
23. Ratnaparkhe M, Singh R, Doyle J. *Glycine. Wild Crop Relatives: Genomic and Breeding Resources*: Springer; 2011. p. 83–116.
24. Doyle JJ, Doyle JL, Brown A. A chloroplast-DNA phylogeny of the wild perennial relatives of soybean (*Glycine* subgenus *Glycine*): congruence with morphological and crossing groups. *Evolution.* 1990:371–89. <https://doi.org/10.1111/j.1558-5646.1990.tb05206.x> PMID: 28564382
25. Sakai M, Kanazawa A, Fujii A, Thseng F, Abe J, Shimamoto Y. Phylogenetic relationships of the chloroplast genomes in the genus *Glycine* inferred from four intergenic spacer sequences. *Plant Syst Evol.* 2003; 239(1):29–54.
26. Xu D, Abe J, Gai J, Shimamoto Y. Diversity of chloroplast DNA SSRs in wild and cultivated soybeans: evidence for multiple origins of cultivated soybean. *Theor Appl Genet.* 2002; 105(5):645–53. <https://doi.org/10.1007/s00122-002-0972-7> PMID: 12582476
27. Xu D, Abe J, Kanazawa A, Gai J, Shimamoto Y. Identification of sequence variations by PCR-RFLP and its application to the evaluation of cpDNA diversity in wild and cultivated soybeans. *Theor Appl Genet.* 2001; 102(5):683–8.
28. Xu D, Abe J, Sakai M, Kanazawa A, Shimamoto Y. Sequence variation of non-coding regions of chloroplast DNA of soybean and related wild species and its implications for the evolution of different chloroplast haplotypes. *TAG Theoretical and Applied Genetics.* 2000; 101(5):724–32.
29. Doyle J, Doyle J, Brown A. Analysis of a polyploid complex in *Glycine* with chloroplast and nuclear DNA. *Australian Systematic Botany.* 1990; 3(1):125–36.
30. DOYLE JJ, DOYLE JL, RAUSCHER JT, Brown A. Evolution of the perennial soybean polyploid complex (*Glycine* subgenus *Glycine*): a study of contrasts. *Biol J Linn Soc.* 2004; 82(4):583–97.
31. Doyle JJ, Doyle JL, Brown A. Incongruence in the diploid B-genome species complex of *Glycine* (Leguminosae) revisited: histone H3-D alleles versus chloroplast haplotypes. *Mol Biol Evol.* 1999; 16(3):354–62. PMID: 10331262
32. Doyle JJ, Doyle JL, Rauscher JT, Brown A. Diploid and polyploid reticulate evolution throughout the history of the perennial soybeans (*Glycine* subgenus *Glycine*). *New Phytol.* 2004; 161(1):121–32.
33. Shinozaki K, Ohme M, Tanaka M, Wakasugi T, Hayashida N, Matsubayashi T, et al. The complete nucleotide sequence of the tobacco chloroplast genome: its gene organization and expression. *The EMBO journal.* 1986; 5(9):2043. PMID: 16453699
34. Daniell H, Lin C-S, Yu M, Chang W-J. Chloroplast genomes: diversity, evolution, and applications in genetic engineering. *Genome Biol.* 2016; 17(1):134. <https://doi.org/10.1186/s13059-016-1004-2> PMID: 27339192
35. Sasaki C, Lee S-B, Daniell H, Wood TC, Tomkins J, Kim H-G, et al. Complete chloroplast genome sequence of *Glycine max* and comparative analyses with other legume genomes. *Plant Mol Biol.* 2005; 59(2):309–22. <https://doi.org/10.1007/s11103-005-8882-0> PMID: 16247559
36. Sherman-Broyles S, Bombarely A, Powell AF, Doyle JL, Egan AN, Coate JE, et al. The wild side of a major crop: Soybean's perennial cousins from Down Under. *Am J Bot.* 2014; 101(10):1651–65. <https://doi.org/10.3732/ajb.1400121> PMID: 25326613
37. Gao C-W, Gao L-Z. The complete chloroplast genome sequence of wild soybean, *Glycine soja*. *Conservation Genetics Resources.* 2016:1–3. <https://doi.org/10.1007/s12686-016-0659-z>
38. Hu TT, Pattyn P, Bakker EG, Cao J, Cheng JF, Clark RM, et al. The *Arabidopsis lyrata* genome sequence and the basis of rapid genome size change. *Nat Genet.* 2011; 43(5):476–+. <https://doi.org/10.1038/ng.807> PMID: 21478890
39. Wyman SK, Jansen RK, Boore JL. Automatic annotation of organellar genomes with DOGMA. *Bioinformatics.* 2004; 20(17):3252–5. <https://doi.org/10.1093/bioinformatics/bth352> PMID: 15180927
40. Schattner P, Brooks AN, Lowe TM. The tRNAscan-SE, snoscan and snoGPS web servers for the detection of tRNAs and snoRNAs. *Nucleic Acids Res.* 2005; 33:W686–W9. <https://doi.org/10.1093/nar/gki366> PMID: 15980563
41. Lohse M, Drechsel O, Bock R. OrganellarGenomeDRAW (OGDRAW): a tool for the easy generation of high-quality custom graphical maps of plastid and mitochondrial genomes. *Curr Genet.* 2007; 52(5–6):267–74. <https://doi.org/10.1007/s00294-007-0161-y> PMID: 17957369
42. Kumar S, Nei M, Dudley J, Tamura K. MEGA: a biologist-centric software for evolutionary analysis of DNA and protein sequences. *Brief Bioinform.* 2008; 9(4):299–306. Epub 2008/04/18. <https://doi.org/10.1093/bib/bbn017> PMID: 18417537;
43. Frazer KA, Pachter L, Poliakov A, Rubin EM, Dubchak I. VISTA: computational tools for comparative genomics. *Nucleic Acids Res.* 2004; 32:W273–W9. <https://doi.org/10.1093/nar/gkh458> PMID: 15215394

44. Kurtz S, Choudhuri JV, Ohlebusch E, Schleiermacher C, Stoye J, Giegerich R. REPuter: the manifold applications of repeat analysis on a genomic scale. *Nucleic Acids Res.* 2001; 29(22):4633–42. <https://doi.org/10.1093/nar/29.22.4633> PMID: 11713313
45. Kraemer L, Beszteri B, Gäbler-Schwarz S, Held C, Leese F, Mayer C, et al. STAMP: Extensions to the STADEN sequence analysis package for high throughput interactive microsatellite marker design. *Bmc Bioinformatics.* 2009; 10(1):41. <https://doi.org/10.1186/1471-2105-10-41> PMID: 19183437
46. Benson G. Tandem repeats finder: a program to analyze DNA sequences. *Nucleic Acids Res.* 1999; 27(2):573–80. Epub 1998/12/24. PMID: 9862982;
47. Katoh K, Standley DM. MAFFT Multiple Sequence Alignment Software Version 7: Improvements in Performance and Usability. *Mol Biol Evol.* 2013; 30(4):772–80. <https://doi.org/10.1093/molbev/mst010> PMID: 23329690
48. Kimura M. A simple method for estimating evolutionary rates of base substitutions through comparative studies of nucleotide sequences. *J Mol Evol.* 1980; 16(2):111–20. Epub 1980/12/01. PMID: 7463489.
49. Librado P, Rozas J. DnaSP v5: a software for comprehensive analysis of DNA polymorphism data. *Bioinformatics.* 2009; 25(11):1451–2. <https://doi.org/10.1093/bioinformatics/btp187> PMID: 19346325
50. Ronquist F, Huelsenbeck JP. MrBayes 3: Bayesian phylogenetic inference under mixed models. *Bioinformatics.* 2003; 19(12):1572–4. Epub 2003/08/13. PMID: 12912839.
51. Swofford DL. Paup—a Computer-Program for Phylogenetic Inference Using Maximum Parsimony. *J Gen Physiol.* 1993; 102(6):A9–A.
52. Wu Z, Tembrock LR, Ge S. Are Differences in Genomic Data Sets due to True Biological Variants or Errors in Genome Assembly: An Example from Two Chloroplast Genomes. *Plos One.* 2015; 10(2): e0118019. <https://doi.org/10.1371/journal.pone.0118019> PMID: 25658309
53. Asaf S, Khan AL, Khan AR, Waqas M, Kang S-M, Khan MA, et al. Complete chloroplast genome of *Nicotiana otophora* and its comparison with related species. *Front Plant Sci.* 2016; 7. <https://doi.org/10.3389/fpls.2016.00843> PMID: 27379132
54. Qian J, Song J, Gao H, Zhu Y, Xu J, Pang X. The complete chloroplast genome sequence of the medicinal plant *Salvia miltiorrhiza*. *Plos One.* 2013; 8. <https://doi.org/10.1371/journal.pone.0057607> PMID: 23460883
55. Asaf S, Waqas M, Khan AL, Khan MA, Kang S-M, Imran QM, et al. The Complete Chloroplast Genome of Wild Rice (*Oryza minuta*) and Its Comparison to Related Species. *Front Plant Sci.* 2017; 8(304). <https://doi.org/10.3389/fpls.2017.00304> PMID: 28326093
56. Chen J, Hao Z, Xu H, Yang L, Liu G, Sheng Y. The complete chloroplast genome sequence of the relict woody plant *Metasequoia glyptostroboides* Hu et Cheng. *Front Plant Sci.* 2015; 6.
57. Morton BR. Selection on the codon bias of chloroplast and cyanelle genes in different plant and algal lineages. *J Mol Evol.* 1998; 46(4):449–59. <https://doi.org/10.1007/Pl00006325> PMID: 9541540
58. Nie XJ, Lv SZ, Zhang YX, Du XH, Wang L, Biradar SS, et al. Complete Chloroplast Genome Sequence of a Major Invasive Species, Crofton Weed (*Ageratina adenophora*). *Plos One.* 2012; 7(5). <https://doi.org/10.1371/journal.pone.0036869> PMID: 22606302
59. Gantt JS, Baldauf SL, Calie PJ, Weeden NF, Palmer JD. Transfer of rpl22 to the nucleus greatly preceded its loss from the chloroplast and involved the gain of an intron. *EMBO J.* 1991; 10.
60. Xu JW, Feng DJ, Song GS, Wei XL, Chen L, Wu XL, et al. The first intron of rice EPSP synthase enhances expression of foreign gene. *Sci China Ser C.* 2003; 46(6):561–+. <https://doi.org/10.1360/02yc0120> PMID: 18758713
61. Kelchner SA. The evolution of non-coding chloroplast DNA and its application in plant systematics. *Annals of the Missouri Botanical Garden.* 2000; 87(4):482–98. <https://doi.org/10.2307/2666142>
62. Wolf PG, Der JP, Duffy AM, Davidson JB, Grusz AL, Pryer KM. The evolution of chloroplast genes and genomes in ferns. *Plant Mol Biol.* 2011; 76(3–5):251–61. <https://doi.org/10.1007/s11103-010-9706-4> PMID: 20976559
63. Oliver MJ, Murdock AG, Mishler BD, Kuehl JV, Boore JL, Mandoli DF, et al. Chloroplast genome sequence of the moss *Tortula ruralis*: gene content, polymorphism, and structural arrangement relative to other green plant chloroplast genomes. *Bmc Genomics.* 2010; 11. <https://doi.org/10.1186/1471-2164-11-143> PMID: 20187961
64. Wicke S, Schneeweiss GM, dePamphilis CW, Müller KF, Quandt D. The evolution of the plastid chromosome in land plants: gene content, gene order, gene function. *Plant Mol Biol.* 2011; 76(3):273–97. <https://doi.org/10.1007/s11103-011-9762-4> PMID: 21424877
65. Jansen RK, Cai Z, Raubeson LA, Daniell H, Leebens-Mack J, Müller KF, et al. Analysis of 81 genes from 64 plastid genomes resolves relationships in angiosperms and identifies genome-scale evolutionary patterns. *Proceedings of the National Academy of Sciences.* 2007; 104(49):19369–74.

66. Nakkaew A, Chotigeat W, Eksomtramage T, Phongdara A. Cloning and expression of a plastid-encoded subunit, beta-carboxyltransferase gene (*accD*) and a nuclear-encoded subunit, biotin carboxylase of acetyl-CoA carboxylase from oil palm (*Elaeis guineensis* Jacq.). *Plant Sci.* 2008; 175(4):497–504.
67. Sherman-Broyles S, Bombarely A, Grimwood J, Schmutz J, Doyle J. Complete plastome sequences from *Glycine syndetika* and six additional perennial wild relatives of soybean. *G3 (Bethesda)*. 2014; 4. <https://doi.org/10.1534/g3.114.012690> PMID: 25155272
68. Sato S, Nakamura Y, Kaneko T, Asamizu E, Tabata S. Complete structure of the chloroplast genome of *Arabidopsis thaliana*. *DNA Res.* 1999; 6(5):283–90. Epub 1999/11/26. PMID: 10574454.
69. Xu Q, Xiong G, Li P, He F, Huang Y, Wang K. Analysis of complete nucleotide sequences of 12 *Gossypium* chloroplast genomes: origin and evolution of allotetraploids. *Plos One.* 2012; 7. <https://doi.org/10.1371/journal.pone.0037128> PMID: 22876273
70. Huang H, Shi C, Liu Y, Mao SY, Gao LZ. Thirteen *Camellia* chloroplast genome sequences determined by high-throughput sequencing: genome structure and phylogenetic relationships. *Bmc Evol Biol.* 2014; 14. <https://doi.org/10.1186/1471-2148-14-151> PMID: 25001059
71. Adachi Y, Kuroda H, Yukawa Y, Sugiura M. Translation of partially overlapping *psbD-psbC* mRNAs in chloroplasts: the role of 5'-processing and translational coupling. *Nucleic Acids Res.* 2012; 40(7):3152–8. <https://doi.org/10.1093/nar/gkr1185> PMID: 22156163
72. Yukawa M, Sugiura M. Termination codon-dependent translation of partially overlapping *ndhC-ndhK* transcripts in chloroplasts. *Proc Natl Acad Sci U S A.* 2008; 105(49):19550–4. Epub 2008/11/27. <https://doi.org/10.1073/pnas.0809240105> PMID: 19033452;
73. Cavalier-Smith T. Chloroplast evolution: Secondary symbiogenesis and multiple losses. *Curr Biol.* 2002; 12(2):R62–R4. [https://doi.org/10.1016/S0960-9822\(01\)00675-3](https://doi.org/10.1016/S0960-9822(01)00675-3) PMID: 11818081
74. Yi X, Gao L, Wang B, Su YJ, Wang T. The Complete Chloroplast Genome Sequence of *Cephalotaxus oliveri* (Cephalotaxaceae): Evolutionary Comparison of *Cephalotaxus* Chloroplast DNAs and Insights into the Loss of Inverted Repeat Copies in Gymnosperms. *Genome Biol Evol.* 2013; 5(4):688–98. <https://doi.org/10.1093/gbe/evt042> PMID: 23538991
75. Asano T, Tsudzuki T, Takahashi S, Shimada H, Kadowaki K. Complete nucleotide sequence of the sugarcane (*Saccharum officinarum*) chloroplast genome: A comparative analysis of four monocot chloroplast genomes. *DNA Res.* 2004; 11(2):93–9. <https://doi.org/10.1093/dnares/11.2.93> PMID: 15449542
76. Timme RE, Kuehl JV, Boore JL, Jansen RK. A comparative analysis of the *Lactuca* and *Helianthus* (Asteraceae) plastid genomes: Identification of divergent regions and categorization of shared repeats. *Am J Bot.* 2007; 94(3):302–12. <https://doi.org/10.3732/ajb.94.3.302> PMID: 21636403
77. Gao L, Yi X, Yang YX, Su YJ, Wang T. Complete chloroplast genome sequence of a tree fern *Alsophila spinulosa*: insights into evolutionary changes in fern chloroplast genomes. *Bmc Evol Biol.* 2009; 9. <https://doi.org/10.1186/1471-2148-9-130> PMID: 19519899
78. Rose O, Falush D. A threshold size for microsatellite expansion. *Mol Biol Evol.* 1998; 15(5):613–5. PMID: 9580993
79. Raubeson LA, Peery R, Chumley TW, Dziubek C, Fourcade HM, Boore JL, et al. Comparative chloroplast genomics: analyses including new sequences from the angiosperms *Nuphar advena* and *Ranunculus macranthus*. *Bmc Genomics.* 2007; 8. <https://doi.org/10.1186/1471-2164-8-174> PMID: 17573971
80. Huotari T, Korpelainen H. Complete chloroplast genome sequence of *Elodea canadensis* and comparative analyses with other monocot plastid genomes. *Gene.* 2012; 508(1):96–105. <https://doi.org/10.1016/j.gene.2012.07.020> PMID: 22841789
81. Powell W, Morgante M, Mcdevitt R, Vendramin GG, Rafalski JA. Polymorphic Simple Sequence Repeat Regions in Chloroplast Genomes—Applications to the Population-Genetics of Pines. *P Natl Acad Sci USA.* 1995; 92(17):7759–63. <https://doi.org/10.1073/pnas.92.17.7759>
82. Provan J, Corbett G, McNicol JW, Powell W. Chloroplast DNA variability in wild and cultivated rice (*Oryza* spp.) revealed by polymorphic chloroplast simple sequence repeats. *Genome.* 1997; 40(1):104–10. <https://doi.org/10.1139/G97-014> PMID: 9061917
83. Pauwels M, Vekemans X, Gode C, Frerot H, Castric V, Saumitou-Laprade P. Nuclear and chloroplast DNA phylogeography reveals vicariance among European populations of the model species for the study of metal tolerance, *Arabidopsis halleri* (Brassicaceae). *New Phytol.* 2012; 193(4):916–28. <https://doi.org/10.1111/j.1469-8137.2011.04003.x> PMID: 22225532
84. Powell W, Morgante M, Andre C, McNicol JW, Machray GC, Doyle JJ, et al. Hypervariable Microsatellites Provide a General Source of Polymorphic DNA Markers for the Chloroplast Genome. *Curr Biol.* 1995; 5(9):1023–9. [https://doi.org/10.1016/S0960-9822\(95\)00206-5](https://doi.org/10.1016/S0960-9822(95)00206-5) PMID: 8542278



85. Li XW, Gao HH, Wang YT, Song JY, Henry R, Wu HZ, et al. Complete chloroplast genome sequence of *Magnolia grandiflora* and comparative analysis with related species. *Sci China Life Sci.* 2013; 56(2):189–98. <https://doi.org/10.1007/s11427-012-4430-8> PMID: 23329156
86. Kuang DY, Wu H, Wang YL, Gao LM, Zhang SZ, Lu L. Complete chloroplast genome sequence of *Magnolia kwangsiensis* (Magnoliaceae): implication for DNA barcoding and population genetics. *Genome.* 2011; 54(8):663–73. <https://doi.org/10.1139/G11-026> PMID: 21793699
87. Palmer JD, Osorio B, Thompson WF. Evolutionary significance of inversions in legume chloroplast DNAs. *Curr Genet.* 1988; 14. <https://doi.org/10.1007/bf00405856>
88. Kazakoff SH, Imelfort M, Edwards D, Koehorst J, Biswas B, Batley J. Capturing the biofuel wellhead and powerhouse: the chloroplast and mitochondrial genomes of the leguminous feedstock tree *Pongamia pinnata*. *Plos One.* 2012; 7. <https://doi.org/10.1371/journal.pone.0051687> PMID: 23272141
89. Tangphatsornruang S, Sangsrakru D, Chanprasert J, Uthapaisanwong P, Yoocha T, Jomchai N, et al. The Chloroplast Genome Sequence of Mungbean (*Vigna radiata*) Determined by High-throughput Pyrosequencing: Structural Organization and Phylogenetic Relationships. *DNA Res.* 2010; 17(1):11–22. <https://doi.org/10.1093/dnares/dsp025> PMID: 20007682
90. Martin GE, Rousseau-Gueutin M, Cordonnier S, Lima O, Michon-Coudouel S, Naquin D, et al. The first complete chloroplast genome of the Genistoid legume *Lupinus luteus*: evidence for a novel major lineage-specific rearrangement and new insights regarding plastome evolution in the legume family. *Ann Bot-London.* 2014; 113(7):1197–210. <https://doi.org/10.1093/aob/mcu050> PMID: 24769537
91. Perry AS, Brennan S, Murphy DJ, Kavanagh TA, Wolfe KH. Evolutionary re-organisation of a large operon in adzuki bean chloroplast DNA caused by inverted repeat movement. *DNA Res.* 2002; 9(5):157–62. <https://doi.org/10.1093/dnares/9.5.157> PMID: 12465715
92. Millen RS, Olmstead RG, Adams KL, Palmer JD, Lao NT, Heggie L. Many parallel losses of *infA* from chloroplast DNA during angiosperm evolution with multiple independent transfers to the nucleus. *Plant Cell.* 2001; 13. <https://doi.org/10.1105/tpc.13.3.645>
93. Sabir J, Schwarz E, Ellison N, Zhang J, Baeshen NA, Mutwakil M, et al. Evolutionary and biotechnology implications of plastid genome variation in the inverted-repeat-lacking clade of legumes. *Plant Biotechnol J.* 2014; 12(6):743–54. <https://doi.org/10.1111/pbi.12179> PMID: 24618204
94. Kumar S, Hahn FM, McMahan CM, Cornish K, Whalen MC. Comparative analysis of the complete sequence of the plastid genome of *Parthenium argentatum* and identification of DNA barcodes to differentiate *Parthenium* species and lines. *Bmc Plant Biol.* 2009; 9. <https://doi.org/10.1186/1471-2229-9-131> PMID: 19917140
95. Xu DH, Abe J, Sakai M, Kanazawa A, Shimamoto Y. Sequence variation of non-coding regions of chloroplast DNA of soybean and related wild species and its implications for the evolution of different chloroplast haplotypes. *Theor Appl Genet.* 2000; 101(5):724–32. <https://doi.org/10.1007/s001220051537>
96. Kanazawa A, Tozuka A, Shimamoto Y. Sequence variation of chloroplast DNA that involves *EcoRI* and *ClaI* restriction site polymorphisms in soybean. *Genes Genet Syst.* 1998; 73(2):111–9. Epub 1998/08/27. PMID: 9718676.
97. Spielmann A, Stutz E. Nucleotide sequence of soybean chloroplast DNA regions which contain the *psbA* and *trnH* genes and cover the ends of the large single copy region and one end of the inverted repeats. *Nucleic Acids Res.* 1983; 11(20):7157–67. PMID: 6314279
98. Skuza L, Filip E, Szućko I. Use of organelle markers to study genetic diversity in soybean. 2013.
99. Small RL, Ryburn JA, Cronn RC, Seelanan T, Wendel JF. The tortoise and the hare: choosing between noncoding plastome and nuclear *Adh* sequences for phylogeny reconstruction in a recently diverged plant group. *Am J Bot.* 1998; 85(9):1301–15. PMID: 21685016
100. Demesure B, Comps B, Petit RJ. Chloroplast DNA phylogeography of the common beech (*Fagus sylvatica* L.) in Europe. *Evolution.* 1996; 50(6):2515–20. <https://doi.org/10.1111/j.1558-5646.1996.tb03638.x> PMID: 28565658
101. Kode V, Mudd EA, Lamtham S, Day A. The tobacco plastid *accD* gene is essential and is required for leaf development. *Plant J.* 2005; 44(2):237–44. <https://doi.org/10.1111/j.1365-3113X.2005.02533.x> PMID: 16212603
102. Goremykin VV, Holland B, Hirsch-Ernst KI, Hellwig FH. Analysis of *Acorus calamus* chloroplast genome and its phylogenetic implications. *Mol Biol Evol.* 2005; 22(9):1813–22. <https://doi.org/10.1093/molbev/msi173> PMID: 15930156
103. Guisinger MM, Kuehl JV, Boore JL, Jansen RK. Genome-wide analyses of Geraniaceae plastid DNA reveal unprecedented patterns of increased nucleotide substitutions. *Proceedings of the National Academy of Sciences.* 2008; 105(47):18424–9.

104. Fajardo D, Senalik D, Ames M, Zhu H, Steffan SA, Harbut R, et al. Complete plastid genome sequence of *Vaccinium macrocarpon*: structure, gene content, and rearrangements revealed by next generation sequencing. *Tree Genet Genomes*. 2013; 9(2):489–98.
105. Harris ME, Meyer G, Vandergon T, Vandergon VO. Loss of the acetyl-CoA carboxylase (*accD*) gene in Poales. *Plant Mol Biol Rep*. 2013; 31(1):21–31.
106. Martínez-Alberola F, del Campo EM, Lázaro-Gimeno D, Mezquita-Claramonte S, Molins A, Mateu-Andrés I, et al. Balanced gene losses, duplications and intensive rearrangements led to an unusual regularly sized genome in *Arbutus unedo* chloroplasts. *Plos One*. 2013; 8(11):e79685. <https://doi.org/10.1371/journal.pone.0079685> PMID: 24260278
107. Yang M, Zhang X, Liu G, Yin Y, Chen K, Yun Q. The complete chloroplast genome sequence of date palm (*Phoenix dactylifera* L.). *Plos One*. 2010; 5. <https://doi.org/10.1371/journal.pone.0012762> PMID: 20856810
108. Wang RJ, Cheng CL, Chang CC, Wu CL, Su TM, Chaw SM. Dynamics and evolution of the inverted repeat-large single copy junctions in the chloroplast genomes of monocots. *Bmc Evol Biol*. 2008; 8. <https://doi.org/10.1186/1471-2148-8-36> PMID: 18237435
109. Yang Y, Dang YY, Li Q, Lu JJ, Li XW, Wang YT. Complete Chloroplast Genome Sequence of Poisonous and Medicinal Plant *Datura stramonium*: Organizations and Implications for Genetic Engineering. *Plos One*. 2014; 9(11). <https://doi.org/10.1371/journal.pone.0110656> PMID: 25365514
110. Moore MJ, Soltis PS, Bell CD, Burleigh JG, Soltis DE. Phylogenetic analysis of 83 plastid genes further resolves the early diversification of eudicots. *Proceedings of the National Academy of Sciences*. 2010; 107(10):4623–8. <https://doi.org/10.1073/pnas.0907801107> PMID: 20176954
111. Goremykin VV, Hirsch-Ernst KI, Wolf S, Hellwig FH. The chloroplast genome of *Nymphaea alba*: Whole-genome analyses and the problem of identifying the most basal angiosperm. *Mol Biol Evol*. 2004; 21(7):1445–54. <https://doi.org/10.1093/molbev/msh147> PMID: 15084683
112. Hohmann N, Schmickl R, Chiang T-Y, Lučanová M, Kolář F, Marhold K, et al. Taming the wild: resolving the gene pools of non-model Arabidopsis lineages. *Bmc Evol Biol*. 2014; 14(1):1–21. <https://doi.org/10.1186/s12862-014-0224-x> PMID: 25344686
113. Singh RJ, Hymowitz T. The genomic relationship between *Glycine max* (L.) Merr. and *G. soja* Sieb. and Zucc. as revealed by pachytene chromosome analysis. *Theor Appl Genet*. 1988; 76(5):705–11. Epub 1988/11/01. <https://doi.org/10.1007/BF00303516> PMID: 24232348.
114. Shoemaker R, Hatfield P, Palmer R, Atherly A. Chloroplast DNA variation in the genus *Glycine* subgenus *Soja*. *J Hered*. 1986; 77(1):26–30.
115. Close P, Shoemaker R, Keim P. Distribution of restriction site polymorphism within the chloroplast genome of the genus *Glycine*, subgenus *Soja*. *Theor Appl Genet*. 1989; 77(6):768–76. <https://doi.org/10.1007/BF00268325> PMID: 24232890
116. Hirata T, Abe J, Shimamoto Y. RFLPs of chloroplast and mitochondrial genomes in summer and autumn maturing cultivar groups of soybean in Kyushu district of Japan. *Soybean genetics newsletter (USA)*. 1996.
117. Lee D, Caha C, Specht J, Graef G. Chloroplast DNA evidence for non-random selection of females in an outcrossed population of soybeans [*Glycine max* (L.)]. *Theor Appl Genet*. 1992; 85(2–3):261–8. <https://doi.org/10.1007/BF00222868> PMID: 24197313
118. Shimamoto Y, Hasegawa A, Abe J, Ohara M, Mikami T. *Glycine soja* germplasm in Japan: isozyme and chloroplast DNA variation. *Soybean genetics newsletter-US Department of Agriculture, Agricultural Research Service (USA)*. 1992.
119. Abe J, Hasegawa A, Fukushi H, Mikami T, Ohara M, Shimamoto Y. Introgression between wild and cultivated soybeans of Japan revealed by RFLP analysis for chloroplast DNAs. *Economic Botany*. 1999; 53(3):285–91.
120. Close P, Shoemaker R, Keim P. Distribution of restriction site polymorphism within the chloroplast genome of the genus *Glycine*, subgenus *Soja*. *TAG Theoretical and Applied Genetics*. 1989; 77(6):768–76. <https://doi.org/10.1007/BF00268325> PMID: 24232890
121. Kajita T, Ohashi H, Tateishi Y, Bailey CD, Doyle JJ. *rbcL* and legume phylogeny, with particular reference to Phaseoleae, Millettieae, and allies. *Syst Bot*. 2001; 26(3):515–36.
122. Kollipara KP, Singh RJ, Hymowitz T. Phylogenetic and genomic relationships in the genus *Glycine* Willd. based on sequences from the ITS region of nuclear rDNA. *Genome*. 1997; 40(1):57–68. Epub 1997/02/01. PMID: 9061914.
123. Zhu T, Schupp JM, Oliphant A, Keim P. Hypomethylated Sequences—Characterization of the Duplicate Soybean Genome. *Mol Gen Genet*. 1994; 244(6):638–45. PMID: 7969033

124. Wambugu P, Brozynska M, Furtado A, Waters D, Henry R. Relationships of wild and domesticated rices (*Oryza* AA genome species) based upon whole chloroplast genome sequences. *Sci Rep*. 2015; 5. <https://doi.org/10.1038/srep13957> PMID: 26355750
125. Gao C-W, Gao L-Z. The complete chloroplast genome sequence of semi-wild soybean, *Glycine gracilis* (Fabales: Fabaceae). *Conservation Genetics Resources*. 2017:1–3.
